# Supplementary material for: Screening Leads to Overestimated Associations of Thyroid Dysfunction and Thyroiditis with Thyroid Cancer Risk
Source: MDPI journal article supplement (doi:10.3390/cancers13215385), 2021-10-27
Supplement: s1 [file s1]

# Screening Leads to Overestimated Associations of Thyroid Dysfunction and Thyroiditis with Thyroid Cancer Risk

Young Shin Song <sup>1</sup>, Kyung Soo Kim <sup>1</sup>, Soo Kyung Kim <sup>1</sup>, Young Wook Cho <sup>1</sup> and Hyo Geun Choi <sup>2,3,\*</sup>

| Table S1. Subgroup analyses according to age, sex, income, and region of residence in each thyroid disease calculating odds ratios (95% confidence intervals) for thyroid cancer in Study I. |                          |                          |                                |         |                  |         |                  |         |                  |         |
|----------------------------------------------------------------------------------------------------------------------------------------------------------------------------------------------|--------------------------|--------------------------|--------------------------------|---------|------------------|---------|------------------|---------|------------------|---------|
| Characteristics                                                                                                                                                                              | Thyroid cancer           | Control                  | Odds ratios for thyroid cancer |         |                  |         |                  |         |                  |         |
|                                                                                                                                                                                              | (exposure/to-<br>tal, %) | (exposure/to-<br>tal, %) | Crude†                         | P-value | Model 1†‡        | P-value | Model 2†§        | P-value | Model 3†         | P-value |
| Age <60 years old (n = 19,020)                                                                                                                                                               |                          |                          |                                |         |                  |         |                  |         |                  |         |
| Hypothyroidism                                                                                                                                                                               | 477/3,804 (12.5)         | 603/15,216 (4.0)         | 3.53 (3.11-4.00)               | <0.001* | 3.59 (3.15-4.09) | <0.001* | 2.98 (2.60-3.42) | <0.001* | 3.43 (2.99-3.92) | <0.001* |
| Hyperthyroidism                                                                                                                                                                              | 251/3,804 (6.6)          | 433/15,216 (2.9)         | 2.42 (2.06-2.83)               | <0.001* | 2.41 (2.04-2.84) | <0.001* | 1.78 (1.49-2.12) | <0.001* | N/A              |         |
| Thyroiditis                                                                                                                                                                                  | 233/3,804 (6.1)          | 308/15,216 (2.0)         | 3.19 (2.68-3.80)               | <0.001* | 3.06 (2.55-3.67) | <0.001* | 1.95 (1.60-2.37) | <0.001* | N/A              |         |
| Autoimmune thyroidi-<br>tis                                                                                                                                                                  | 97/3,804 (2.6)           | 142/15,216 (0.9)         | 2.79 (2.15-3.62)               | <0.001* | 2.66 (2.02-3.49) | <0.001* | N/A              |         | 1.49 (1.12-1.98) | 0.007*  |
| Graves' disease                                                                                                                                                                              | 27/3,804 (0.7)           | 53/15,216 (0.4)          | 2.04 (1.28-3.25)               | 0.003*  | 1.98 (1.21-3.22) | 0.006*  | N/A              |         | 1.65 (0.99-2.74) | 0.054   |
| Age ≥60 years old (n = 9,310)                                                                                                                                                                |                          |                          |                                |         |                  |         |                  |         |                  |         |
| Hypothyroidism                                                                                                                                                                               | 233/1,862 (12.5)         | 280/7,448 (3.8)          | 3.72 (3.09-4.46)               | <0.001* | 3.79 (3.14-4.57) | <0.001* | 3.23 (2.66-3.93) | <0.001* | 3.54 (2.92-4.28) | <0.001* |

|                         |                  |                  |                    |         |                    |         |                   |         |                    |         |
|-------------------------|------------------|------------------|--------------------|---------|--------------------|---------|-------------------|---------|--------------------|---------|
| Hyperthyroidism         | 118/1,862 (6.3)  | 229/7,448 (3.1)  | 2.14 (1.70-2.69)   | <0.001* | 2.16 (1.71-2.74)   | <0.001* | 1.66 (1.30-2.13)  | <0.001* | N/A                |         |
| Thyroiditis             | 106/1,862 (5.7)  | 137/7,448 (1.8)  | 3.25 (2.51-4.22)   | <0.001* | 3.40 (2.60-4.44)   | <0.001* | 2.53 (1.91-3.34)  | <0.001* | N/A                |         |
| Autoimmune thyroiditis  | 53/1,862 (2.9)   | 63/7,448 (0.9)   | 3.45 (2.38-5.00)   | <0.001* | 3.61 (2.47-5.27)   | <0.001* | N/A               |         | 2.57 (1.73-3.83)   | <0.001* |
| Graves' disease         | 14/1,862 (0.8)   | 24/7,448 (0.3)   | 2.35 (1.21-4.55)   | 0.012*  | 2.51 (1.28-4.90)   | 0.007*  | N/A               |         | 2.02 (1.00-4.10)   | 0.052   |
| Males (n = 5,980)       |                  |                  |                    |         |                    |         |                   |         |                    |         |
| Hypothyroidism          | 81/1,196 (6.8)   | 32/4,784 (0.7)   | 10.69 (7.07-16.17) | <0.001* | 10.58 (6.88-16.27) | <0.001* | 8.63 (5.55-13.43) | <0.001* | 10.39 (6.73-16.05) | <0.001* |
| Hyperthyroidism         | 61/1,196 (5.1)   | 70/4,784 (1.5)   | 3.62 (2.56-5.14)   | <0.001* | 3.65 (2.53-5.28)   | <0.001* | 2.52 (1.69-3.77)  | <0.001* | N/A                |         |
| Thyroiditis             | 25/1,196 (2.1)   | 17/4,784 (0.4)   | 6.00 (3.23-11.14)  | <0.001* | 6.24 (3.30-11.80)  | <0.001* | 3.45 (1.72-6.92)  | 0.001*  | N/A                |         |
| Autoimmune thyroiditis  | 7/1,196 (0.6)    | 11/4,784 (0.2)   | 2.55 (0.99-6.59)   | 0.053   | 2.82 (1.08-7.36)   | 0.034*  | N/A               |         | 1.23 (0.39-3.88)   | 0.723   |
| Graves' disease         | 5/1,196 (0.4)    | 8/4,784 (0.2)    | 2.50 (0.82-7.66)   | 0.108   | 2.29 (0.70-7.49)   | 0.172   | N/A               |         | 1.45 (0.38-5.55)   | 0.590   |
| Females (n = 22,350)    |                  |                  |                    |         |                    |         |                   |         |                    |         |
| Hypothyroidism          | 629/4,470 (14.1) | 851/17,880 (4.8) | 3.29 (2.95-3.66)   | <0.001* | 3.37 (3.02-3.77)   | <0.001* | 2.84 (2.52-3.19)  | <0.001* | 3.16 (2.82-3.55)   | <0.001* |
| Hyperthyroidism         | 308/4,470 (6.9)  | 592/17,880 (3.3) | 2.16 (1.88-2.49)   | <0.001* | 2.17 (1.87-2.51)   | <0.001* | 1.62 (1.39-1.89)  | <0.001* | N/A                |         |
| Thyroiditis             | 314/4,470 (7.0)  | 428/17,880 (2.4) | 3.09 (2.66-3.59)   | <0.001* | 3.05 (2.61-3.56)   | <0.001* | 2.09 (1.78-2.46)  | <0.001* | N/A                |         |
| Autoimmune thyroiditis  | 143/4,470 (3.2)  | 194/17,880 (1.1) | 3.02 (2.43-3.76)   | <0.001* | 2.97 (2.37-3.73)   | <0.001* | N/A               |         | 1.86 (1.47-2.36)   | <0.001* |
| Graves' disease         | 36/4,470 (0.8)   | 69/17,880 (0.4)  | 2.10 (1.40-3.14)   | <0.001* | 2.15 (1.42-3.26)   | <0.001* | N/A               |         | 1.81 (1.17-2.78)   | 0.007*  |
| Low income (n = 11,215) |                  |                  |                    |         |                    |         |                   |         |                    |         |

|                          |                  |                  |                  |         |                  |         |                  |         |                  |         |
|--------------------------|------------------|------------------|------------------|---------|------------------|---------|------------------|---------|------------------|---------|
| Hypothyroidism           | 293/2,243 (13.1) | 330/8,972 (3.7)  | 3.97 (3.37-4.69) | <0.001* | 4.00 (3.37-4.74) | <0.001* | 3.31 (2.77-3.96) | <0.001* | 3.76 (3.16-4.48) | <0.001* |
| Hyperthyroidism          | 144/2,243 (6.4)  | 262/8,972 (2.9)  | 2.28 (1.85-2.81) | <0.001* | 2.35 (1.90-2.92) | <0.001* | 1.68 (1.34-2.12) | <0.001* | N/A              |         |
| Thyroiditis              | 142/2,243 (6.3)  | 171/8,972 (1.9)  | 3.50 (2.79-4.40) | <0.001* | 3.44 (2.72-4.36) | <0.001* | 2.25 (1.75-2.90) | <0.001* | N/A              |         |
| Autoimmune thyroiditis   | 61/2,243 (2.7)   | 79/8,972 (0.9)   | 3.16 (2.25-4.43) | <0.001* | 3.10 (2.19-4.40) | <0.001* | N/A              |         | 1.79 (1.23-2.60) | 0.002*  |
| Graves' disease          | 19/2,243 (0.9)   | 29/8,972 (0.3)   | 2.63 (1.47-4.70) | 0.001*  | 2.70 (1.48-4.91) | 0.001*  | N/A              |         | 2.18 (1.17-4.07) | 0.015*  |
| High income (n = 17,115) |                  |                  |                  |         |                  |         |                  |         |                  |         |
| Hypothyroidism           | 417/3,423 (12.2) | 553/13,692 (4.0) | 3.35 (2.93-3.84) | <0.001* | 3.45 (3.01-3.96) | <0.001* | 2.90 (2.51-3.35) | <0.001* | 3.25 (2.82-3.75) | <0.001* |
| Hyperthyroidism          | 225/3,423 (6.6)  | 400/13,692 (2.9) | 2.34 (1.98-2.77) | <0.001* | 2.31 (1.94-2.75) | <0.001* | 1.77 (1.47-2.12) | <0.001* | N/A              |         |
| Thyroiditis              | 197/3,423 (5.8)  | 274/13,692 (2.0) | 3.02 (2.50-3.65) | <0.001* | 3.02 (2.49-3.67) | <0.001* | 2.05 (1.67-2.52) | <0.001* | N/A              |         |
| Autoimmune thyroiditis   | 89/3,423 (2.6)   | 126/13,692 (0.9) | 2.89 (2.20-3.80) | <0.001* | 2.91 (2.19-3.86) | <0.001* | N/A              |         | 1.81 (1.34-2.43) | <0.001* |
| Graves' disease          | 22/3,423 (0.6)   | 48/13,692 (0.4)  | 1.84 (1.11-3.05) | 0.018*  | 1.84 (1.09-3.10) | 0.022*  | N/A              |         | 1.52 (0.88-2.62) | 0.137   |
| Urban (n = 13,595)       |                  |                  |                  |         |                  |         |                  |         |                  |         |
| Hypothyroidism           | 355/2,719 (13.1) | 470/10,876 (4.3) | 3.37 (2.91-3.90) | <0.001* | 3.38 (2.90-3.93) | <0.001* | 2.84 (2.43-3.33) | <0.001* | 3.18 (2.72-3.71) | <0.001* |
| Hyperthyroidism          | 172/2,719 (6.3)  | 317/10,876 (2.9) | 2.25 (1.86-2.73) | <0.001* | 2.23 (1.83-2.72) | <0.001* | 1.63 (1.32-2.00) | <0.001* | N/A              |         |
| Thyroiditis              | 178/2,719 (6.6)  | 258/10,876 (2.4) | 2.91 (2.39-3.54) | <0.001* | 2.81 (2.29-3.45) | <0.001* | 1.91 (1.54-2.37) | <0.001* | N/A              |         |
| Autoimmune thyroiditis   | 83/2,719 (3.1)   | 124/10,876 (1.1) | 2.74 (2.07-3.64) | <0.001* | 2.69 (2.01-3.60) | <0.001* | N/A              |         | 1.65 (1.21-2.24) | 0.002*  |
| Graves' disease          | 21/2,719 (0.8)   | 37/10,876 (0.3)  | 2.28 (1.33-3.90) | 0.003*  | 2.32 (1.34-4.04) | 0.003*  | N/A              |         | 1.86 (1.04-3.31) | 0.036*  |

Rural (n = 14,735)

|                        |                  |                  |                  |         |                  |         |                  |         |                  |         |
|------------------------|------------------|------------------|------------------|---------|------------------|---------|------------------|---------|------------------|---------|
| Hypothyroidism         | 355/2,947 (12.1) | 413/11,788 (3.5) | 3.83 (3.30-4.45) | <0.001* | 3.96 (3.40-4.62) | <0.001* | 3.29 (2.81-3.86) | <0.001* | 3.74 (3.20-4.37) | <0.001* |
| Hyperthyroidism        | 197/2,947 (6.7)  | 345/11,788 (2.9) | 2.38 (1.99-2.85) | <0.001* | 2.41 (2.00-2.90) | <0.001* | 1.83 (1.51-2.23) | <0.001* | N/A              |         |
| Thyroiditis            | 161/2,947 (5.5)  | 187/11,788 (1.6) | 3.61 (2.91-4.48) | <0.001* | 3.67 (2.94-4.58) | <0.001* | 2.43 (1.92-3.08) | <0.001* | N/A              |         |
| Autoimmune thyroiditis | 67/2,947 (2.3)   | 81/11,788 (0.7)  | 3.37 (2.43-4.67) | <0.001* | 3.38 (2.41-4.73) | <0.001* | N/A              |         | 2.04 (1.43-2.91) | <0.001* |
| Graves' disease        | 20/2,947 (0.7)   | 40/11,788 (0.3)  | 2.01 (1.17-3.44) | 0.011*  | 2.00 (1.14-3.50) | 0.016*  | N/A              |         | 1.68 (0.94-3.01) | 0.081   |

\* Conditional logistic regression, Significance at  $P < 0.05$ , † Models were stratified by age, sex, income, and region of residence. ‡ Model 1 was adjusted for total cholesterol, systolic blood pressure, diastolic blood pressure, fasting blood glucose, obesity, smoking, alcohol consumption, and Charlson comorbidity index scores. § Model 2 was adjusted for model 1 plus hypothyroidism, hyperthyroidism, and thyroiditis. || Model 3 was adjusted for model 1 plus hypothyroidism, autoimmune thyroiditis, and Graves' disease.

**Table S2.** Subgroup analyses according to thyroid diseases in each thyroid disease calculating odds ratios (95% confidence intervals) for thyroid cancer in Study I.

| Characteristics                 | Thyroid cancer      | Control             | Odds ratios for thyroid cancer |                 |                  |                 |                  |                 |                  |                 |
|---------------------------------|---------------------|---------------------|--------------------------------|-----------------|------------------|-----------------|------------------|-----------------|------------------|-----------------|
|                                 | (exposure/total, %) | (exposure/total, %) | Crude                          | <i>P</i> -value | Model 1†         | <i>P</i> -value | Model 2‡         | <i>P</i> -value | Model 3§         | <i>P</i> -value |
| Non-hypothyroidism (n = 26,737) |                     |                     |                                |                 |                  |                 |                  |                 |                  |                 |
| Hypothyroidism                  | 0/4,956 (0.0)       | 0/21,781 (0.0)      | N/A                            |                 | N/A              |                 | N/A              |                 | N/A              |                 |
| Hyperthyroidism                 | 264/4,956 (5.3)     | 516/21,781 (2.4)    | 2.33 (2.00-2.71)               | <0.001*         | 2.37 (2.02-2.77) | <0.001*         | 2.14 (1.82-2.51) | <0.001*         | N/A              |                 |
| Thyroiditis                     | 232/4,956 (4.7)     | 274/21,781 (1.3)    | 3.91 (3.27-4.67)               | <0.001*         | 3.82 (3.18-4.60) | <0.001*         | 3.51 (2.91-4.23) | <0.001*         | N/A              |                 |
| Autoimmune thyroiditis          | 98/4,956 (2.0)      | 98/21,781 (0.5)     | 4.51 (3.40-5.98)               | <0.001*         | 4.29 (3.20-5.75) | <0.001*         | N/A              |                 | 4.24 (3.16-5.69) | <0.001*         |
| Graves' disease                 | 31/4,956 (0.6)      | 64/21,781 (0.3)     | 2.15 (1.40-3.30)               | 0.001*          | 2.20 (1.41-3.44) | 0.001*          | N/A              |                 | 2.08 (1.32-3.28) | 0.002*          |
| Hypothyroidism (n= 1,593)       |                     |                     |                                |                 |                  |                 |                  |                 |                  |                 |
| Hypothyroidism                  | 710/710 (100.0)     | 883/883 (100.0)     | N/A                            |                 | N/A              |                 | N/A              |                 | N/A              |                 |

|                                  |                  |                  |                  |         |                  |         |                  |         |                  |         |
|----------------------------------|------------------|------------------|------------------|---------|------------------|---------|------------------|---------|------------------|---------|
| Hyperthyroidism                  | 105/710 (14.8)   | 146/883 (16.5)   | 0.84 (0.64-1.12) | 0.233   | 0.81 (0.60-1.08) | 0.146   | 0.82 (0.61-1.09) | 0.170   | N/A              |         |
| Thyroiditis                      | 107/710 (15.1)   | 171/883 (19.4)   | 0.77 (0.59-1.01) | 0.060   | 0.78 (0.59-1.04) | 0.086   | 0.79 (0.60-1.05) | 0.099   | N/A              |         |
| Autoimmune thyroiditis           | 52/710 (7.3)     | 107/883 (12.1)   | 0.60 (0.42-0.85) | 0.004*  | 0.62 (0.43-0.89) | 0.009*  | N/A              |         | 0.62 (0.43-0.89) | 0.009*  |
| Graves' disease                  | 10/710 (1.4)     | 13/883 (1.5)     | 0.89 (0.38-2.07) | 0.783   | 0.78 (0.32-1.89) | 0.576   | N/A              |         | 0.78 (0.32-1.90) | 0.585   |
| Non-hyperthyroidism (n = 27,299) |                  |                  |                  |         |                  |         |                  |         |                  |         |
| Hypothyroidism                   | 605/5,297 (11.4) | 737/22,002 (3.4) | 3.77 (3.37-4.22) | <0.001* | 3.88 (3.46-4.36) | <0.001* | 3.40 (3.01-3.83) | <0.001* | 3.62 (3.22-4.08) | <0.001* |
| Hyperthyroidism                  | 0/5,297 (0.0)    | 0/22,002 (0.0)   | N/A              |         | N/A              |         | N/A              |         | N/A              |         |
| Thyroiditis                      | 294/5,297 (5.6)  | 360/22,002 (1.6) | 3.56 (3.04-4.17) | <0.001* | 3.60 (3.06-4.24) | <0.001* | 2.53 (2.13-3.00) | <0.001* | N/A              |         |
| Autoimmune thyroiditis           | 133/5,297 (2.5)  | 151/22,002 (0.7) | 3.74 (2.96-4.74) | <0.001* | 3.77 (2.96-4.81) | <0.001* | N/A              |         | 2.33 (1.80-3.01) | <0.001* |
| Graves' disease                  | 0/5,297 (0.0)    | 0/22,002 (0.0)   | N/A              |         | N/A              |         | N/A              |         | N/A              |         |
| Hyperthyroidism (n = 1,031)      |                  |                  |                  |         |                  |         |                  |         |                  |         |
| Hypothyroidism                   | 105/369 (28.5)   | 146/662 (22.1)   | 1.46 (1.09-1.96) | 0.012*  | 1.45 (1.06-1.97) | 0.019*  | 1.49 (1.09-2.03) | 0.013*  | 1.57 (1.14-2.15) | 0.005*  |
| Hyperthyroidism                  | 369/369 (100.0)  | 662/662 (100.0)  | N/A              |         | N/A              |         | N/A              |         | N/A              |         |
| Thyroiditis                      | 45/369 (12.2)    | 85/662 (12.8)    | 0.94 (0.64-1.39) | 0.771   | 0.87 (0.57-1.31) | 0.490   | 0.80 (0.53-1.22) | 0.298   | N/A              |         |
| Autoimmune thyroiditis           | 17/369 (4.6)     | 54/662 (8.2)     | 0.55 (0.31-0.97) | 0.038*  | 0.50 (0.28-0.92) | 0.025*  | N/A              |         | 0.44 (0.24-0.81) | 0.008*  |
| Graves' disease                  | 41/369 (11.1)    | 77/662 (11.6)    | 0.94 (0.63-1.41) | 0.775   | 0.92 (0.60-1.41) | 0.701   | N/A              |         | 0.95 (0.62-1.45) | 0.799   |
| Non-Graves' disease (n = 28,212) |                  |                  |                  |         |                  |         |                  |         |                  |         |
| Hypothyroidism                   | 700/5,625 (12.4) | 870/22,587 (3.9) | 3.60 (3.24-4.00) | <0.001* | 3.69 (3.31-4.11) | <0.001* | 3.08 (2.75-3.45) | <0.001* | 3.47 (3.11-3.88) | <0.001* |
| Hyperthyroidism                  | 328/5,625 (5.8)  | 585/22,587 (2.6) | 2.33 (2.03-2.68) | <0.001* | 2.35 (2.04-2.71) | <0.001* | 1.73 (1.49-2.01) | <0.001* | N/A              |         |

|                              |                  |                  |                  |         |                  |         |                  |         |                   |         |
|------------------------------|------------------|------------------|------------------|---------|------------------|---------|------------------|---------|-------------------|---------|
| Thyroiditis                  | 334/5,625 (5.9)  | 436/22,587 (1.9) | 3.23 (2.79-3.74) | <0.001* | 3.25 (2.79-3.78) | <0.001* | 2.17 (1.85-2.55) | <0.001* | N/A               |         |
| Autoimmune thyroiditis       | 149/5,625 (2.7)  | 198/22,587 (0.9) | 3.09 (2.49-3.83) | <0.001* | 3.12 (2.50-3.89) | <0.001* | N/A              |         | 1.89 (1.50-2.39)  | <0.001* |
| Graves' disease              | 0/5,625 (0.0)    | 0/22,587 (0.0)   | N/A              |         | N/A              |         | N/A              |         | N/A               |         |
| Graves' disease (n = 118)    |                  |                  |                  |         |                  |         |                  |         |                   |         |
| Hypothyroidism               | 10/41 (24.4)     | 13/77 (16.9)     | 1.61 (0.63-4.11) | 0.322   | 1.46 (0.52-4.14) | 0.477   | 1.52 (0.53-4.36) | 0.438   | 1.63 (0.53-5.02)  | 0.396   |
| Hyperthyroidism              | 41/41 (100.0)    | 77/77 (100.0)    | N/A              |         | N/A              |         | N/A              |         | N/A               |         |
| Thyroiditis                  | 5/41 (12.2)      | 9/77 (11.7)      | 1.00 (0.31-3.23) | 0.994   | 0.55 (0.13-2.30) | 0.412   | 0.53 (0.13-2.22) | 0.383   | N/A               |         |
| Autoimmune thyroiditis       | 1/41 (2.4)       | 7/77 (9.1)       | 0.21 (0.03-1.85) | 0.161   | 0.04 (0.00-0.73) | 0.031*  | N/A              |         | 0.04 (0.002-0.69) | 0.027*  |
| Graves' disease              | 41/41 (100.0)    | 77/77 (100.0)    | N/A              |         | N/A              |         | N/A              |         | N/A               |         |
| Non-thyroiditis (n = 27,546) |                  |                  |                  |         |                  |         |                  |         |                   |         |
| Hypothyroidism               | 603/5,327 (11.3) | 712/22,219 (3.2) | 3.92 (3.50-4.39) | <0.001* | 3.99 (3.55-4.48) | <0.001* | 3.99 (3.55-4.48) | <0.001* | 3.96 (3.52-4.45)  | <0.001* |
| Hyperthyroidism              | 324/5,327 (6.1)  | 577/22,219 (2.6) | 2.44 (2.12-2.81) | <0.001* | 2.48 (2.15-2.87) | <0.001* | 2.48 (2.15-2.87) | <0.001* | N/A               |         |
| Thyroiditis                  | 0/5,327 (0.0)    | 0/22,219 (0.0)   | N/A              |         | N/A              |         | N/A              |         | N/A               |         |
| Autoimmune thyroiditis       | 0/5,327 (0.0)    | 0/22,219 (0.0)   | N/A              |         | N/A              |         | N/A              |         | N/A               |         |
| Graves' disease              | 36/5,327 (0.7)   | 68/22,219 (0.3)  | 2.23 (1.48-3.34) | <0.001* | 2.35 (1.55-3.55) | <0.001* | N/A              |         | 1.96 (1.27-3.02)  | 0.002*  |
| Thyroiditis (n = 784)        |                  |                  |                  |         |                  |         |                  |         |                   |         |
| Hypothyroidism               | 107/339 (31.6)   | 171/445 (38.4)   | 0.75 (0.56-1.02) | 0.063   | 0.74 (0.53-1.01) | 0.061   | 0.75 (0.55-1.04) | 0.085   | 0.73 (0.53-1.01)  | 0.060   |
| Hyperthyroidism              | 45/339 (13.3)    | 85/445 (19.1)    | 0.61 (0.41-0.90) | 0.014*  | 0.58 (0.38-0.88) | 0.011*  | 0.59 (0.39-0.90) | 0.015*  | N/A               |         |
| Thyroiditis                  | 339/339 (100.0)  | 445/445 (100.0)  | N/A              |         | N/A              |         | N/A              |         | N/A               |         |

|                                         |                  |                  |                  |         |                  |         |                  |         |                  |         |
|-----------------------------------------|------------------|------------------|------------------|---------|------------------|---------|------------------|---------|------------------|---------|
| Autoimmune thyroiditis                  | 150/339 (44.3)   | 205/445 (46.1)   | 0.95 (0.71-1.27) | 0.724   | 0.96 (0.71-1.29) | 0.764   | N/A              |         | 1.02 (0.75-1.39) | 0.913   |
| Graves' disease                         | 5/339 (1.5)      | 9/445 (2.0)      | 0.66 (0.22-2.01) | 0.464   | 0.40 (0.11-1.40) | 0.151   | N/A              |         | 0.39 (0.11-1.37) | 0.143   |
| Non-autoimmune thyroiditis (n = 27,975) |                  |                  |                  |         |                  |         |                  |         |                  |         |
| Hypothyroidism                          | 658/5,516 (11.9) | 776/22,459 (3.5) | 3.84 (3.45-4.29) | <0.001* | 3.91 (3.49-4.37) | <0.001* | 3.43 (3.06-3.85) | <0.001* | 3.88 (3.47-4.35) | <0.001* |
| Hyperthyroidism                         | 352/5,516 (6.4)  | 608/22,459 (2.7) | 2.46 (2.15-2.81) | <0.001* | 2.48 (2.16-2.86) | <0.001* | 1.92 (1.66-2.23) | <0.001* | N/A              |         |
| Thyroiditis                             | 189/5,516 (3.4)  | 240/22,459 (1.1) | 3.31 (2.73-4.01) | <0.001* | 3.30 (2.70-4.03) | <0.001* | 2.39 (1.94-2.95) | <0.001* | N/A              |         |
| Autoimmune thyroiditis                  | 0/5,516 (0.0)    | 0/22,459 (0.0)   | N/A              |         | N/A              |         | N/A              |         | N/A              |         |
| Graves' disease                         | 40/5,516 (0.7)   | 70/22,459 (0.3)  | 2.34 (1.59-3.46) | <0.001* | 2.43 (1.63-3.63) | <0.001* | N/A              |         | 2.06 (1.36-3.13) | 0.001*  |
| Autoimmune thyroiditis (n = 355)        |                  |                  |                  |         |                  |         |                  |         |                  |         |
| Hypothyroidism                          | 52/150 (34.7)    | 107/205 (52.2)   | 0.47 (0.31-0.74) | 0.001*  | 0.49 (0.31-0.79) | 0.003*  | 0.52 (0.32-0.84) | 0.008*  | 0.48 (0.30-0.78) | 0.003*  |
| Hyperthyroidism                         | 17/150 (11.3)    | 54/205 (26.3)    | 0.35 (0.19-0.63) | 0.001*  | 0.32 (0.17-0.60) | 0.001*  | 0.33 (0.17-0.64) | 0.001*  | N/A              |         |
| Thyroiditis                             | 150/150 (100.0)  | 205/205 (100.0)  | N/A              |         | N/A              |         | N/A              |         | N/A              |         |
| Autoimmune thyroiditis                  | 150/150 (100.0)  | 205/205 (100.0)  | N/A              |         | N/A              |         | N/A              |         | N/A              |         |
| Graves' disease                         | 1/150 (0.7)      | 7/205 (3.4)      | 0.18 (0.02-1.51) | 0.115   | 0.05 (0.00-0.54) | 0.014*  | N/A              |         | 0.04 (0.00-0.51) | 0.013*  |

\* Un-conditional logistic regression, Significance at  $P < 0.05$ . † Model 1 was adjusted for age, sex, income, region of residence, total cholesterol, systolic blood pressure, diastolic blood pressure, fasting blood glucose, obesity, smoking, alcohol consumption, and Charlson comorbidity index scores. ‡ Model 2 was adjusted for model 1 plus hypothyroidism, hyperthyroidism, and thyroiditis. § Model 3 was adjusted for model 1 plus hypothyroidism, autoimmune thyroiditis, and Graves' disease.

**Table S3.** Subgroup analyses according to obesity, alcohol consumption, and smoking in each thyroid disease calculating odds ratios (95% confidence intervals) for thyroid cancer in Study I.

| Characteristics | Thyroid cancer<br>(exposure/total, %) | Control<br>(exposure/total, %) | Odds ratios for thyroid cancer |         |          |         |          |         |          |         |
|-----------------|---------------------------------------|--------------------------------|--------------------------------|---------|----------|---------|----------|---------|----------|---------|
|                 |                                       |                                | Crude                          | P-value | Model 1† | P-value | Model 2‡ | P-value | Model 3§ | P-value |

|                            |                  |                 |                   |         |                   |         |                   |         |                   |         |
|----------------------------|------------------|-----------------|-------------------|---------|-------------------|---------|-------------------|---------|-------------------|---------|
| Underweight (n = 593)      |                  |                 |                   |         |                   |         |                   |         |                   |         |
| Hypothyroidism             | 10/76 (13.2)     | 15/517 (2.9)    | 5.17 (2.20-12.17) | <0.001* | 4.52 (1.86-11.00) | 0.001*  | 4.33 (1.72-10.88) | 0.002*  | 4.41 (1.81-10.77) | 0.001*  |
| Hyperthyroidism            | 5/76 (6.6)       | 18/517 (3.5)    | 1.81 (0.64-5.10)  | 0.260   | 1.83 (0.64-5.24)  | 0.263   | 1.20 (0.38-3.75)  | 0.754   | N/A               |         |
| Thyroiditis                | 2/76 (2.6)       | 8/517 (1.6)     | 1.58 (0.32-7.75)  | 0.570   | 1.50 (0.29-7.74)  | 0.630   | 1.42 (0.27-7.37)  | 0.680   | N/A               |         |
| Autoimmune thyroiditis     | 1/76 (1.3)       | 3/517 (0.6)     | 2.40 (0.24-23.68) | 0.453   | 2.65 (0.26-26.66) | 0.407   | N/A               |         | 1.90 (0.17-20.80) | 0.600   |
| Graves' disease            | 0/76 (0.0)       | 2/517 (0.4)     | N/A               |         | N/A               |         | N/A               |         | N/A               |         |
| Normal weight (n = 10,260) |                  |                 |                   |         |                   |         |                   |         |                   |         |
| Hypothyroidism             | 253/1,872 (13.5) | 350/8,388 (4.2) | 3.54 (2.98-4.20)  | <0.001* | 3.69 (3.10-4.40)  | <0.001* | 2.98 (2.48-3.59)  | <0.001* | 3.46 (2.88-4.15)  | <0.001* |
| Hyperthyroidism            | 137/1,872 (7.3)  | 261/8,388 (3.1) | 2.43 (1.97-3.01)  | <0.001* | 2.44 (1.96-3.03)  | <0.001* | 1.90 (1.51-2.40)  | <0.001* | N/A               |         |
| Thyroiditis                | 136/1,872 (7.3)  | 177/8,388 (2.1) | 3.58 (2.84-4.50)  | <0.001* | 3.52 (2.78-4.47)  | <0.001* | 2.21 (1.72-2.86)  | <0.001* | N/A               |         |
| Autoimmune thyroiditis     | 55/1,872 (2.9)   | 74/8,388 (0.9)  | 3.33 (2.34-4.74)  | <0.001* | 3.29 (2.28-4.73)  | <0.001* | N/A               |         | 1.78 (1.21-2.63)  | 0.003*  |
| Graves' disease            | 15/1,872 (0.8)   | 38/8,388 (0.5)  | 1.77 (0.97-3.22)  | 0.063   | 1.64 (0.88-3.06)  | 0.118   | N/A               |         | 1.36 (0.70-2.62)  | 0.362   |
| Overweight (n = 7,818)     |                  |                 |                   |         |                   |         |                   |         |                   |         |
| Hypothyroidism             | 194/1,611 (12.0) | 237/6,207 (3.8) | 3.53 (2.89-4.31)  | <0.001* | 3.55 (2.88-4.36)  | <0.001* | 2.99 (2.41-3.71)  | <0.001* | 3.42 (2.77-4.22)  | <0.001* |
| Hyperthyroidism            | 117/1,611 (7.3)  | 186/6,207 (3.0) | 2.55 (2.01-3.23)  | <0.001* | 2.59 (2.02-3.31)  | <0.001* | 1.91 (1.48-2.48)  | <0.001* | N/A               |         |
| Thyroiditis                | 85/1,611 (5.3)   | 141/6,207 (2.3) | 2.43 (1.84-3.20)  | <0.001* | 2.41 (1.81-3.21)  | <0.001* | 1.59 (1.17-2.15)  | 0.003*  | N/A               |         |
| Autoimmune thyroiditis     | 37/1,611 (2.3)   | 69/6,207 (1.1)  | 2.12 (1.41-3.17)  | <0.001* | 2.21 (1.46-3.35)  | <0.001* | N/A               |         | 1.38 (0.89-2.13)  | 0.153   |
| Graves' disease            | 12/1,611 (0.7)   | 18/6,207 (0.3)  | 2.61 (1.25-5.42)  | 0.010*  | 2.73 (1.28-5.83)  | 0.009*  | N/A               |         | 2.39 (1.10-5.21)  | 0.028*  |
| Obese (n = 9,659)          |                  |                 |                   |         |                   |         |                   |         |                   |         |



|                                      |                  |                  |                  |         |                   |         |                  |         |                   |         |
|--------------------------------------|------------------|------------------|------------------|---------|-------------------|---------|------------------|---------|-------------------|---------|
| Hypothyroidism                       | 253/2,107 (12.0) | 281/7,552 (3.7)  | 3.64 (3.04-4.35) | <0.001* | 3.71 (3.09-4.46)  | <0.001* | 3.17 (2.62-3.84) | <0.001* | 3.45 (2.86-4.16)  | <0.001* |
| Hyperthyroidism                      | 110/2,107 (5.2)  | 197/7,552 (2.6)  | 2.08 (1.64-2.64) | <0.001* | 2.05 (1.60-2.62)  | <0.001* | 1.46 (1.13-1.90) | 0.004*  | N/A               |         |
| Thyroiditis                          | 116/2,107 (5.5)  | 119/7,552 (1.6)  | 3.71 (2.86-4.82) | <0.001* | 3.66 (2.79-4.79)  | <0.001* | 2.62 (1.98-3.49) | <0.001* | N/A               |         |
| Autoimmune thyroiditis               | 57/2,107 (2.7)   | 59/7,552 (0.8)   | 3.57 (2.47-5.16) | <0.001* | 3.43 (2.34-5.02)  | <0.001* | N/A              |         | 2.25 (1.51-3.36)  | <0.001* |
| Graves' disease                      | 14/2,107 (0.7)   | 19/7,552 (0.3)   | 2.68 (1.34-5.36) | 0.005*  | 2.72 (1.33-5.55)  | 0.006*  | N/A              |         | 2.00 (0.95-4.25)  | 0.070   |
| Non-smoker (n = 24,376)              |                  |                  |                  |         |                   |         |                  |         |                   |         |
| Hypothyroidism                       | 664/4,959 (13.4) | 843/19,417 (4.3) | 3.46 (3.11-3.86) | <0.001* | 3.55 (3.18-3.96)  | <0.001* | 2.96 (2.63-3.32) | <0.001* | 3.33 (2.97-3.72)  | <0.001* |
| Hyperthyroidism                      | 328/4,959 (6.6)  | 600/19,417 (3.1) | 2.24 (1.95-2.57) | <0.001* | 2.27 (1.97-2.62)  | <0.001* | 1.68 (1.44-1.95) | <0.001* | N/A               |         |
| Thyroiditis                          | 326/4,959 (6.6)  | 428/19,417 (2.2) | 3.17 (2.73-3.67) | <0.001* | 3.16 (2.71-3.68)  | <0.001* | 2.11 (1.80-2.48) | <0.001* | N/A               |         |
| Autoimmune thyroiditis               | 148/4,959 (3.0)  | 197/19,417 (1.0) | 3.04 (2.45-3.77) | <0.001* | 3.03 (2.43-3.79)  | <0.001* | N/A              |         | 1.84 (1.45-2.32)  | <0.001* |
| Graves' disease                      | 38/4,959 (0.8)   | 71/19,417 (0.4)  | 2.12 (1.43-3.15) | <0.001* | 2.17 (1.44-3.26)  | <0.001* | N/A              |         | 1.78 (1.17-2.73)  | 0.008*  |
| Past and current smoker (n = 3,954)  |                  |                  |                  |         |                   |         |                  |         |                   |         |
| Hypothyroidism                       | 46/707 (6.5)     | 40/3,247 (1.2)   | 6.14 (3.96-9.52) | <0.001* | 6.99 (4.39-11.14) | <0.001* | 6.19 (3.85-9.96) | <0.001* | 6.96 (4.37-11.10) | <0.001* |
| Hyperthyroidism                      | 41/707 (5.8)     | 62/3,247 (1.9)   | 3.23 (2.16-4.84) | <0.001* | 3.21 (2.09-4.91)  | <0.001* | 2.51 (1.60-3.93) | <0.001* | N/A               |         |
| Thyroiditis                          | 13/707 (1.8)     | 17/3,247 (0.5)   | 3.79 (1.83-7.87) | <0.001* | 4.27 (2.02-9.03)  | <0.001* | 3.29 (1.52-7.13) | 0.003   | N/A               |         |
| Autoimmune thyroiditis               | 2/707 (0.3)      | 8/3,247 (0.3)    | 1.20 (0.26-5.69) | 0.815   | 1.37 (0.29-6.55)  | 0.694   | N/A              |         | 1.17 (0.23-5.87)  | 0.852   |
| Graves' disease                      | 3/707 (0.4)      | 6/3,247 (0.2)    | 2.34 (0.58-9.41) | 0.230   | 1.79 (0.41-7.87)  | 0.443   | N/A              |         | 1.24 (0.24-6.26)  | 0.799   |
| Alcohol < 1 time a week (n = 22,060) |                  |                  |                  |         |                   |         |                  |         |                   |         |
| Hypothyroidism                       | 610/4,430 (13.8) | 746/17,630 (4.2) | 3.68 (3.29-4.12) | <0.001* | 3.75 (3.33-4.21)  | <0.001* | 3.10 (2.75-3.51) | <0.001* | 3.52 (3.13-3.97)  | <0.001* |

|                                     |                 |                  |                  |         |                  |         |                  |         |                  |         |
|-------------------------------------|-----------------|------------------|------------------|---------|------------------|---------|------------------|---------|------------------|---------|
| Hyperthyroidism                     | 310/4,430 (7.0) | 540/17,630 (3.1) | 2.39 (2.07-2.76) | <0.001* | 2.43 (2.10-2.82) | <0.001* | 1.80 (1.54-2.11) | <0.001* | N/A              |         |
| Thyroiditis                         | 293/4,430 (6.6) | 377/17,630 (2.1) | 3.29 (2.81-3.85) | <0.001* | 3.31 (2.81-3.89) | <0.001* | 2.21 (1.86-2.62) | <0.001* | N/A              |         |
| Autoimmune thyroiditis              | 127/4,430 (2.9) | 171/17,630 (1.0) | 3.05 (2.42-3.85) | <0.001* | 3.08 (2.42-3.92) | <0.001* | N/A              |         | 1.84 (1.43-2.38) | <0.001* |
| Graves' disease                     | 35/4,430 (0.8)  | 66/17,630 (0.4)  | 2.13 (1.41-3.21) | <0.001* | 2.16 (1.42-3.31) | <0.001* | N/A              |         | 1.87 (1.20-2.92) | 0.006*  |
| Alcohol ≥ 1 time a week (n = 6,270) |                 |                  |                  |         |                  |         |                  |         |                  |         |
| Hypothyroidism                      | 100/1,236 (8.1) | 137/5,034 (2.7)  | 3.09 (2.36-4.04) | <0.001* | 3.18 (2.41-4.20) | <0.001* | 2.76 (2.06-3.69) | <0.001* | 3.04 (2.29-4.04) | <0.001* |
| Hyperthyroidism                     | 59/1,236 (4.8)  | 122/5,034 (2.4)  | 1.98 (1.44-2.72) | <0.001* | 1.94 (1.40-2.70) | <0.001* | 1.49 (1.05-2.10) | 0.025*  | N/A              |         |
| Thyroiditis                         | 46/1,236 (3.7)  | 68/5,034 (1.4)   | 2.74 (1.87-4.01) | <0.001* | 2.54 (1.71-3.78) | <0.001* | 1.70 (1.12-2.59) | 0.013*  | N/A              |         |
| Autoimmune thyroiditis              | 23/1,236 (1.9)  | 34/5,034 (0.7)   | 2.67 (1.56-4.56) | <0.001* | 2.41 (1.38-4.19) | 0.002*  | N/A              |         | 1.56 (0.87-2.77) | 0.133   |
| Graves' disease                     | 6/1,236 (0.5)   | 11/5,034 (0.2)   | 2.20 (0.81-5.97) | 0.121   | 1.92 (0.66-5.53) | 0.229   | N/A              |         | 1.20 (0.41-3.54) | 0.738   |

\* Un-conditional logistic regression, Significance at  $P < 0.05$ . † Model 1 was adjusted for age, sex, income, region of residence, total cholesterol, systolic blood pressure, diastolic blood pressure, fasting blood glucose, obesity, smoking, alcohol consumption, and Charlson comorbidity index scores. ‡ Model 2 was adjusted for model 1 plus hypothyroidism, hyperthyroidism, and thyroiditis. § Model 3 was adjusted for model 1 plus hypothyroidism, autoimmune thyroiditis, and Graves' disease.

**Table S4.** Subgroup analyses according to CCI, total cholesterol, blood pressure, and fasting blood glucose in each thyroid disease calculating odds ratios (95% confidence intervals) for thyroid cancer in Study I.

| Characteristics          | Thyroid cancer      | Control             | Odds ratios for thyroid cancer |                 |                  |                 |                  |                 |                  |                 |
|--------------------------|---------------------|---------------------|--------------------------------|-----------------|------------------|-----------------|------------------|-----------------|------------------|-----------------|
|                          | (exposure/total, %) | (exposure/total, %) | Crude                          | <i>P</i> -value | Model 1†         | <i>P</i> -value | Model 2‡         | <i>P</i> -value | Model 3§         | <i>P</i> -value |
| CCI 0 score (n = 21,098) |                     |                     |                                |                 |                  |                 |                  |                 |                  |                 |
| Hypothyroidism           | 447/3,441 (13.0)    | 689/17,657 (3.9)    | 3.70 (3.26-4.20)               | <0.001*         | 3.70 (3.26-4.20) | <0.001*         | 3.05 (2.67-3.49) | <0.001*         | 3.49 (3.07-3.98) | <0.001*         |
| Hyperthyroidism          | 221/3,441 (6.4)     | 506/17,657 (2.9)    | 2.32 (1.97-2.73)               | <0.001*         | 2.32 (1.97-2.73) | <0.001*         | 1.69 (1.42-2.00) | <0.001*         | N/A              |                 |
| Thyroiditis              | 213/3,441 (6.2)     | 341/17,657 (1.9)    | 3.34 (2.80-3.99)               | <0.001*         | 3.35 (2.81-4.00) | <0.001*         | 2.16 (1.78-2.61) | <0.001*         | N/A              |                 |

|                                            |                  |                  |                   |         |                   |         |                  |         |                   |         |
|--------------------------------------------|------------------|------------------|-------------------|---------|-------------------|---------|------------------|---------|-------------------|---------|
| Autoimmune thyroiditis                     | 94/3,441 (2.7)   | 162/17,657 (0.9) | 3.02 (2.33-3.90)  | <0.001* | 2.99 (2.31-3.87)  | <0.001* | N/A              |         | 1.69 (1.28-2.23)  | <0.001* |
| Graves' disease                            | 24/3,441 (0.7)   | 62/17,657 (0.4)  | 1.98 (1.23-3.17)  | 0.005*  | 1.98 (1.23-3.18)  | 0.005*  | N/A              |         | 1.69 (1.03-2.76)  | 0.037*  |
| CCI 1 score (n = 3,668)                    |                  |                  |                   |         |                   |         |                  |         |                   |         |
| Hypothyroidism                             | 110/918 (12.0)   | 122/2,750 (4.4)  | 2.90 (2.21-3.80)  | <0.001* | 2.84 (2.16-3.73)  | <0.001* | 2.47 (1.86-3.26) | <0.001* | 2.66 (2.02-3.51)  | <0.001* |
| Hyperthyroidism                            | 59/918 (6.4)     | 93/2,750 (3.4)   | 1.95 (1.39-2.73)  | <0.001* | 1.96 (1.40-2.75)  | <0.001* | 1.57 (1.10-2.23) | 0.013*  | N/A               |         |
| Thyroiditis                                | 56/918 (6.1)     | 60/2,750 (2.2)   | 2.86 (1.96-4.16)  | <0.001* | 2.88 (1.98-4.21)  | <0.001* | 2.28 (1.54-3.36) | <0.001* | N/A               |         |
| Autoimmune thyroiditis                     | 25/918 (2.7)     | 26/2,750 (1.0)   | 2.84 (1.63-4.95)  | <0.001* | 2.82 (1.61-4.93)  | <0.001* | N/A              |         | 2.15 (1.20-3.83)  | 0.010*  |
| Graves' disease                            | 10/918 (1.1)     | 06/2,750 (0.2)   | 5.05 (1.83-13.95) | 0.002*  | 4.69 (1.69-13.00) | 0.003*  | N/A              |         | 4.18 (1.48-11.85) | 0.007*  |
| CCI ≥ 2 score (n = 3,564)                  |                  |                  |                   |         |                   |         |                  |         |                   |         |
| Hypothyroidism                             | 153/1,307 (11.7) | 72/2,257 (3.2)   | 4.04 (3.01-5.42)  | <0.001* | 4.73 (3.44-6.49)  | <0.001* | 4.04 (2.92-5.59) | <0.001* | 1.81 (1.16-2.82)  | 0.009*  |
| Hyperthyroidism                            | 89/1,307 (6.8)   | 63/2,257 (2.8)   | 2.51 (1.80-3.51)  | <0.001* | 2.93 (2.04-4.21)  | <0.001* | 2.27 (1.56-3.32) | <0.001* | N/A               |         |
| Thyroiditis                                | 70/1,307 (5.4)   | 44/2,257 (2.0)   | 2.78 (1.88-4.10)  | <0.001* | 2.68 (1.74-4.13)  | <0.001* | 1.81 (1.16-2.82) | 0.009*  | N/A               |         |
| Autoimmune thyroiditis                     | 31/1,307 (2.4)   | 17/2,257 (0.8)   | 3.11 (1.71-5.68)  | <0.001* | 2.91 (1.50-5.66)  | 0.002*  | N/A              |         | 2.08 (1.06-4.05)  | 0.032*  |
| Graves' disease                            | 7/1,307 (0.5)    | 9/2,257 (0.4)    | 1.28 (0.47-3.48)  | 0.635   | 1.05 (0.34-3.22)  | 0.933   | N/A              |         | 0.57 (0.18-1.80)  | 0.337   |
| Total cholesterol < 200 mg/dL (n = 14,427) |                  |                  |                   |         |                   |         |                  |         |                   |         |
| Hypothyroidism                             | 388/3,021 (12.8) | 462/11,406 (4.1) | 3.55 (3.08-4.09)  | <0.001* | 3.58 (3.09-4.14)  | <0.001* | 3.00 (2.58-3.50) | <0.001* | 3.37 (2.90-3.92)  | <0.001* |
| Hyperthyroidism                            | 210/3,021 (7.0)  | 352/11,406 (3.1) | 2.35 (1.97-2.80)  | <0.001* | 2.42 (2.02-2.90)  | <0.001* | 1.84 (1.52-2.22) | <0.001* | N/A               |         |
| Thyroiditis                                | 179/3,021 (5.9)  | 233/11,406 (2.0) | 3.06 (2.50-3.73)  | <0.001* | 3.01 (2.45-3.70)  | <0.001* | 2.06 (1.65-2.56) | <0.001* | N/A               |         |
| Autoimmune thyroiditis                     | 81/3,021 (2.7)   | 106/11,406 (0.9) | 2.96 (2.21-3.97)  | <0.001* | 2.95 (2.18-3.99)  | <0.001* | N/A              |         | 1.80 (1.31-2.47)  | <0.001* |

|                                                         |                  |                  |                  |         |                  |         |                  |         |                  |         |
|---------------------------------------------------------|------------------|------------------|------------------|---------|------------------|---------|------------------|---------|------------------|---------|
| Graves' disease                                         | 22/3,021 (0.7)   | 45/11,406 (0.4)  | 1.86 (1.11-3.10) | 0.018*  | 1.98 (1.17-3.34) | 0.011*  | N/A              |         | 1.59 (0.92-2.74) | 0.100   |
| Total cholesterol $\geq$ 200 to < 240 mg/dL (n = 9,774) |                  |                  |                  |         |                  |         |                  |         |                  |         |
| Hypothyroidism                                          | 228/1,882 (12.1) | 291/7,892 (3.7)  | 3.61 (3.01-4.34) | <0.001* | 3.82 (3.17-4.61) | <0.001* | 3.14 (2.58-3.83) | <0.001* | 3.55 (2.92-4.30) | <0.001* |
| Hyperthyroidism                                         | 115/1,882 (6.1)  | 204/7,892 (2.6)  | 2.44 (1.93-3.09) | <0.001* | 2.35 (1.84-3.00) | <0.001* | 1.67 (1.29-2.17) | <0.001* | N/A              |         |
| Thyroiditis                                             | 117/1,882 (6.2)  | 154/7,892 (2.0)  | 3.33 (2.60-4.26) | <0.001* | 3.41 (2.64-4.40) | <0.001* | 2.28 (1.74-3.00) | <0.001* | N/A              |         |
| Autoimmune thyroiditis                                  | 55/1,882 (2.9)   | 72/7,892 (0.9)   | 3.25 (2.28-4.64) | <0.001* | 3.19 (2.20-4.62) | <0.001* | N/A              |         | 1.88 (1.27-2.79) | 0.002*  |
| Graves' disease                                         | 15/1,882 (0.8)   | 21/7,892 (0.3)   | 3.00 (1.54-5.83) | 0.001*  | 2.96 (1.48-5.89) | 0.002*  | N/A              |         | 2.29 (1.10-4.76) | 0.027*  |
| Total cholesterol $\geq$ 240 mg/dL (n = 4,129)          |                  |                  |                  |         |                  |         |                  |         |                  |         |
| Hypothyroidism                                          | 94/763 (12.3)    | 130/3,366 (3.9)  | 3.55 (2.68-4.70) | <0.001* | 3.61 (2.70-4.82) | <0.001* | 3.05 (2.25-4.13) | <0.001* | 3.51 (2.61-4.70) | <0.001* |
| Hyperthyroidism                                         | 44/763 (5.8)     | 106/3,366 (3.2)  | 1.89 (1.32-2.72) | 0.001*  | 1.95 (1.35-2.83) | <0.001* | 1.48 (1.01-2.19) | 0.047*  | N/A              |         |
| Thyroiditis                                             | 43/763 (5.6)     | 58/3,366 (1.7)   | 3.40 (2.27-5.10) | <0.001* | 3.37 (2.22-5.12) | <0.001* | 2.05 (1.31-3.22) | 0.002*  | N/A              |         |
| Autoimmune thyroiditis                                  | 14/763 (1.8)     | 27/3,366 (0.8)   | 2.30 (1.20-4.41) | 0.012*  | 2.45 (1.26-4.79) | 0.009*  | N/A              |         | 1.51 (0.75-3.04) | 0.245   |
| Graves' disease                                         | 4/763 (0.5)      | 11/3,366 (0.3)   | 1.61 (0.51-5.08) | 0.415   | 1.20 (0.35-4.18) | 0.771   | N/A              |         | 1.30 (0.37-4.54) | 0.680   |
| SBP < 140 mmHg and DBP < 90 mmHg (n = 22,777)           |                  |                  |                  |         |                  |         |                  |         |                  |         |
| Hypothyroidism                                          | 573/4,528 (12.7) | 766/18,249 (4.2) | 3.35 (2.99-3.76) | <0.001* | 3.40 (3.02-3.83) | <0.001* | 2.82 (2.49-3.19) | <0.001* | 3.18 (2.82-3.59) | <0.001* |
| Hyperthyroidism                                         | 312/4,528 (6.9)  | 549/18,249 (3.0) | 2.39 (2.07-2.76) | <0.001* | 2.39 (2.06-2.77) | <0.001* | 1.80 (1.54-2.10) | <0.001* | N/A              |         |
| Thyroiditis                                             | 288/4,528 (6.4)  | 389/18,249 (2.1) | 3.14 (2.69-3.67) | <0.001* | 3.11 (2.64-3.66) | <0.001* | 2.11 (1.78-2.51) | <0.001* | N/A              |         |
| Autoimmune thyroiditis                                  | 129/4,528 (2.9)  | 176/18,249 (1.0) | 3.02 (2.40-3.80) | <0.001* | 3.03 (2.39-3.85) | <0.001* | N/A              |         | 1.89 (1.47-2.43) | <0.001* |
| Graves' disease                                         | 37/4,528 (0.8)   | 68/18,249 (0.4)  | 2.21 (1.48-3.30) | <0.001* | 2.11 (1.39-3.20) | 0.001*  | N/A              |         | 1.75 (1.13-2.70) | 0.013*  |

|                                                |                  |                  |                  |         |                  |         |                  |         |                  |         |
|------------------------------------------------|------------------|------------------|------------------|---------|------------------|---------|------------------|---------|------------------|---------|
| SBP ≥ 140 mmHg or DBP ≥ 90 mmHg (n = 5,553)    |                  |                  |                  |         |                  |         |                  |         |                  |         |
| Hypothyroidism                                 | 137/1,138 (12.0) | 117/4,415 (2.7)  | 5.11 (3.94-6.61) | <0.001* | 5.30 (4.06-6.90) | <0.001* | 4.57 (3.47-6.01) | <0.001* | 5.14 (3.93-6.73) | <0.001* |
| Hyperthyroidism                                | 57/1,138 (5.0)   | 113/4,415 (2.6)  | 1.99 (1.44-2.76) | <0.001* | 2.02 (1.45-2.82) | <0.001* | 1.42 (0.99-2.03) | 0.057   | N/A              |         |
| Thyroiditis                                    | 51/1,138 (4.5)   | 56/4,415 (1.3)   | 3.67 (2.50-5.41) | <0.001* | 3.70 (2.49-5.49) | <0.001* | 2.27 (1.49-3.47) | <0.001* | N/A              |         |
| Autoimmune thyroiditis                         | 21/1,138 (1.9)   | 29/4,415 (0.7)   | 2.86 (1.62-5.04) | <0.001* | 2.69 (1.50-4.82) | 0.001*  | N/A              |         | 1.38 (0.74-2.57) | 0.313   |
| Graves' disease                                | 4/1,138 (0.4)    | 9/4,415 (0.2)    | 1.70 (0.52-5.55) | 0.376   | 1.98 (0.61-6.51) | 0.258   | N/A              |         | 1.41 (0.40-4.98) | 0.592   |
| Fasting blood glucose < 100 mg/dL (n = 19,526) |                  |                  |                  |         |                  |         |                  |         |                  |         |
| Hypothyroidism                                 | 508/3,915 (13.0) | 617/15,611 (4.0) | 3.69 (3.26-4.17) | <0.001* | 3.74 (3.29-4.25) | <0.001* | 3.13 (2.74-3.58) | <0.001* | 3.52 (3.09-4.01) | <0.001* |
| Hyperthyroidism                                | 258/3,915 (6.6)  | 462/15,611 (3.0) | 2.32 (1.98-2.71) | <0.001* | 2.31 (1.97-2.72) | <0.001* | 1.74 (1.47-2.06) | <0.001* | N/A              |         |
| Thyroiditis                                    | 243/3,915 (6.2)  | 331/15,611 (2.1) | 3.08 (2.60-3.66) | <0.001* | 3.06 (2.56-3.65) | <0.001* | 2.01 (1.67-2.43) | <0.001* | N/A              |         |
| Autoimmune thyroiditis                         | 108/3,915 (2.8)  | 152/15,611 (1.0) | 2.91 (2.26-3.73) | <0.001* | 2.92 (2.26-3.78) | <0.001* | N/A              |         | 1.71 (1.30-2.24) | <0.001* |
| Graves' disease                                | 30/3,915 (0.8)   | 56/15,611 (0.4)  | 2.15 (1.38-3.36) | 0.001*  | 2.15 (1.36-3.41) | 0.001*  | N/A              |         | 1.79 (1.11-2.90) | 0.018*  |
| Fasting blood glucose ≥ 100 mg/dL (n = 8,804)  |                  |                  |                  |         |                  |         |                  |         |                  |         |
| Hypothyroidism                                 | 202/1,751 (11.5) | 266/7,053 (3.8)  | 3.35 (2.76-4.06) | <0.001* | 3.44 (2.82-4.19) | <0.001* | 2.87 (2.33-3.53) | <0.001* | 2.40 (1.77-3.24) | <0.001* |
| Hyperthyroidism                                | 111/1,751 (6.3)  | 200/7,053 (2.8)  | 2.31 (1.82-2.94) | <0.001* | 2.29 (1.79-2.93) | <0.001* | 1.68 (1.29-2.18) | <0.001* | N/A              |         |
| Thyroiditis                                    | 96/1,751 (5.5)   | 114/7,053 (1.6)  | 3.53 (2.67-4.66) | <0.001* | 3.45 (2.59-4.60) | <0.001* | 2.40 (1.77-3.24) | <0.001* | N/A              |         |
| Autoimmune thyroiditis                         | 42/1,751 (2.4)   | 53/7,053 (0.8)   | 3.24 (2.15-4.88) | <0.001* | 3.09 (2.03-4.73) | <0.001* | N/A              |         | 2.04 (1.31-3.16) | 0.002*  |
| Graves' disease                                | 11/1,751 (0.6)   | 21/7,053 (0.3)   | 2.10 (1.01-4.36) | 0.048*  | 2.01 (0.94-4.27) | 0.071   | N/A              |         | 1.55 (0.70-3.44) | 0.281   |

\* Un-conditional logistic regression, Significance at  $P < 0.05$ . † Model 1 was adjusted for age, sex, income, region of residence, total cholesterol, systolic blood pressure, diastolic blood pressure, fasting blood glucose, obesity, smoking, alcohol consumption, and Charlson comorbidity index scores. ‡ Model 2 was adjusted for model 1 plus hypothyroidism, hyperthyroidism, and thyroiditis. § Model 3 was adjusted for model 1 plus hypothyroidism, autoimmune thyroiditis, and Graves' disease.

**Table S5.** Subgroup analyses according to age, sex, income, and region of residence in each thyroid disease calculating odds ratios (95% confidence intervals) for thyroid cancer in Study II.

| Characteristics                  | Thyroid cancer        | Control             | Odds ratios for thyroid cancer |         |                  |         |                  |         |                  |         |
|----------------------------------|-----------------------|---------------------|--------------------------------|---------|------------------|---------|------------------|---------|------------------|---------|
|                                  | (exposure/total, %)   | (exposure/total, %) | Crude                          | P-value | Model 1†         | P-value | Model 2‡         | P-value | Model 3§         | P-value |
| Age ≤ 60 years old (n = 294,232) |                       |                     |                                |         |                  |         |                  |         |                  |         |
| Hypothyroidism                   | 16,900/147,116 (11.5) | 5,760/147,116 (3.9) | 3.19 (3.09-3.29)               | <0.001* | 1.35 (1.31-1.40) | <0.001* | 1.34 (1.29-1.39) | <0.001* | 1.36 (1.31-1.40) | <0.001* |
| Hyperthyroidism                  | 9,926/147,116 (6.8)   | 4,353/147,116 (3.0) | 2.37 (2.29-2.46)               | <0.001* | 0.84 (0.80-0.87) | <0.001* | 0.79 (0.75-0.82) | <0.001* | N/A              |         |
| Thyroiditis                      | 9,962/147,116 (6.8)   | 3,161/147,116 (2.2) | 3.31 (3.18-3.45)               | <0.001* | 1.43 (1.36-1.49) | <0.001* | 1.40 (1.33-1.46) | <0.001* | N/A              |         |
| Autoimmune thyroiditis           | 4,585/147,116 (3.1)   | 1,369/147,116 (0.9) | 3.43 (3.22-3.64)               | <0.001* | 1.23 (1.15-1.32) | <0.001* | N/A              |         | 1.17 (1.10-1.26) | <0.001* |
| Graves' disease                  | 3,748/147,116 (2.6)   | 1,548/147,116 (1.1) | 2.46 (2.32-2.61)               | <0.001* | 0.72 (0.66-0.77) | <0.001* | N/A              |         | 0.68 (0.63-0.74) | <0.001* |
| Age > 60 years old (n = 132,332) |                       |                     |                                |         |                  |         |                  |         |                  |         |
| Hypothyroidism                   | 8,566/66,166 (13.0)   | 3,234/66,166 (4.9)  | 2.89 (2.78-3.02)               | <0.001* | 1.19 (1.14-1.25) | <0.001* | 1.19 (1.13-1.25) | <0.001* | 1.19 (1.14-1.25) | <0.001* |
| Hyperthyroidism                  | 4,781/66,166 (7.2)    | 2,129/66,166 (3.2)  | 2.34 (2.22-2.47)               | <0.001* | 0.85 (0.80-0.91) | <0.001* | 0.83 (0.78-0.88) | <0.001* | N/A              |         |
| Thyroiditis                      | 4,179/66,166 (6.3)    | 1,486/66,166 (2.3)  | 2.93 (2.76-3.12)               | <0.001* | 1.31 (1.22-1.40) | <0.001* | 1.29 (1.20-1.38) | <0.001* | N/A              |         |
| Autoimmune thyroiditis           | 1,977/66,166 (3.0)    | 653/66,166 (1.0)    | 3.09 (2.83-3.38)               | <0.001* | 1.19 (1.08-1.32) | 0.001*  | N/A              |         | 1.17 (1.05-1.29) | 0.003*  |
| Graves' disease                  | 1,556/66,166 (2.4)    | 659/66,166 (1.0)    | 2.39 (2.18-2.62)               | <0.001* | 0.73 (0.65-0.81) | <0.001* | N/A              |         | 0.71 (0.64-0.80) | <0.001* |
| Males (n = 75,054)               |                       |                     |                                |         |                  |         |                  |         |                  |         |

|                          |                       |                     |                   |         |                  |         |                  |         |                  |         |
|--------------------------|-----------------------|---------------------|-------------------|---------|------------------|---------|------------------|---------|------------------|---------|
| Hypothyroidism           | 1,698/37,527 (4.5)    | 298/37,527 (0.8)    | 5.92 (5.23-6.70)  | <0.001* | 2.27 (1.97-2.61) | <0.001* | 2.22 (1.93-2.56) | <0.001* | 2.24 (1.95-2.58) | <0.001* |
| Hyperthyroidism          | 1,510/37,527 (4.0)    | 433/37,527 (1.2)    | 3.59 (3.22-4.00)  | <0.001* | 0.92 (0.80-1.06) | 0.234   | 0.82 (0.71-0.94) | 0.005*  | N/A              |         |
| Thyroiditis              | 1,017/37,527 (2.7)    | 137/37,527 (0.4)    | 7.59 (6.35-9.07)  | <0.001* | 2.94 (2.41-3.58) | <0.001* | 2.87 (2.35-3.50) | <0.001* | N/A              |         |
| Autoimmune thyroiditis   | 436/37,527 (1.2)      | 50/37,527 (0.1)     | 8.81 (6.57-11.81) | <0.001* | 2.61 (1.88-3.62) | <0.001* | N/A              |         | 2.42 (1.74-3.37) | <0.001* |
| Graves' disease          | 634/37,527 (1.7)      | 155/37,527 (0.4)    | 4.14 (3.47-4.94)  | <0.001* | 0.81 (0.64-1.02) | 0.077   | N/A              |         | 0.75 (0.59-0.95) | 0.016*  |
| Females (n = 351,510)    |                       |                     |                   |         |                  |         |                  |         |                  |         |
| Hypothyroidism           | 23,768/175,755 (13.5) | 8,696/175,755 (5.0) | 3.00 (2.93-3.08)  | <0.001* | 1.29 (1.25-1.33) | <0.001* | 1.27 (1.24-1.31) | <0.001* | 1.29 (1.25-1.33) | <0.001* |
| Hyperthyroidism          | 13,197/175,755 (7.5)  | 6,049/175,755 (3.4) | 2.28 (2.21-2.35)  | <0.001* | 0.84 (0.81-0.87) | <0.001* | 0.80 (0.77-0.83) | <0.001* | N/A              |         |
| Thyroiditis              | 13,124/175,755 (7.5)  | 4,510/175,755 (2.6) | 3.06 (2.96-3.17)  | <0.001* | 1.36 (1.31-1.41) | <0.001* | 1.33 (1.28-1.39) | <0.001* | N/A              |         |
| Autoimmune thyroiditis   | 6,126/175,755 (3.5)   | 1,972/175,755 (1.1) | 3.18 (3.02-3.35)  | <0.001* | 1.20 (1.14-1.28) | <0.001* | N/A              |         | 1.16 (1.10-1.23) | <0.001* |
| Graves' disease          | 4,670/175,755 (2.7)   | 2,052/175,755 (1.2) | 2.31 (2.19-2.43)  | <0.001* | 0.72 (0.67-0.77) | <0.001* | N/A              |         | 0.69 (0.65-0.74) | <0.001* |
| Low income (n = 250,721) |                       |                     |                   |         |                  |         |                  |         |                  |         |
| Hypothyroidism           | 14,285/116,439 (12.3) | 5,173/134,282 (3.9) | 3.49 (3.38-3.61)  | <0.001* | 1.39 (1.33-1.44) | <0.001* | 1.36 (1.31-1.42) | <0.001* | 1.38 (1.33-1.44) | <0.001* |
| Hyperthyroidism          | 8,380/116,439 (7.2)   | 3,864/134,282 (2.9) | 2.62 (2.52-2.72)  | <0.001* | 0.85 (0.81-0.89) | <0.001* | 0.80 (0.76-0.84) | <0.001* | N/A              |         |
| Thyroiditis              | 7,928/116,439 (6.8)   | 2,596/134,282 (1.9) | 3.71 (3.54-3.88)  | <0.001* | 1.54 (1.46-1.62) | <0.001* | 1.50 (1.43-1.58) | <0.001* | N/A              |         |
| Autoimmune thyroiditis   | 3,575/116,439 (3.1)   | 1,094/134,282 (0.8) | 3.86 (3.60-4.13)  | <0.001* | 1.35 (1.24-1.45) | <0.001* | N/A              |         | 1.29 (1.19-1.40) | <0.001* |
| Graves' disease          | 3,049/116,439 (2.6)   | 1,357/134,282 (1.0) | 2.63 (2.47-2.81)  | <0.001* | 0.68 (0.62-0.73) | <0.001* | N/A              |         | 0.64 (0.59-0.70) | <0.001* |

|                           |                       |                     |                  |         |                  |         |                  |         |                  |         |
|---------------------------|-----------------------|---------------------|------------------|---------|------------------|---------|------------------|---------|------------------|---------|
| High income (n = 175,843) |                       |                     |                  |         |                  |         |                  |         |                  |         |
| Hypothyroidism            | 11,181/96,843 (11.6)  | 3,821/79,000 (4.8)  | 2.57 (2.47-2.67) | <0.001* | 1.19 (1.14-1.24) | <0.001* | 1.19 (1.14-1.24) | <0.001* | 1.19 (1.14-1.25) | <0.001* |
| Hyperthyroidism           | 6,327/96,843 (6.5)    | 2,618/79,000 (3.3)  | 2.04 (1.95-2.14) | <0.001* | 0.83 (0.78-0.87) | <0.001* | 0.80 (0.76-0.85) | <0.001* | N/A              |         |
| Thyroiditis               | 6,213/96,843 (6.4)    | 2,051/79,000 (2.6)  | 2.57 (2.45-2.71) | <0.001* | 1.21 (1.14-1.28) | <0.001* | 1.20 (1.14-1.28) | <0.001* | N/A              |         |
| Autoimmune thyroiditis    | 2,987/96,843 (3.1)    | 928/79,000 (1.2)    | 2.68 (2.49-2.88) | <0.001* | 1.09 (1.00-1.18) | 0.056   | N/A              |         | 1.06 (0.97-1.15) | 0.202   |
| Graves' disease           | 2,255/96,843 (2.3)    | 850/79,000 (1.1)    | 2.19 (2.02-2.37) | <0.001* | 0.78 (0.71-0.86) | <0.001* | N/A              |         | 0.76 (0.69-0.84) | <0.001* |
| Urban (n = 197,934)       |                       |                     |                  |         |                  |         |                  |         |                  |         |
| Hypothyroidism            | 11,836/98,967 (12.0)  | 4,297/98,967 (4.3)  | 2.99 (2.89-3.10) | <0.001* | 1.27 (1.22-1.33) | <0.001* | 1.26 (1.20-1.31) | <0.001* | 1.27 (1.22-1.33) | <0.001* |
| Hyperthyroidism           | 6,750/98,967 (6.8)    | 3,046/98,967 (3.1)  | 2.30 (2.21-2.41) | <0.001* | 0.85 (0.80-0.89) | <0.001* | 0.81 (0.77-0.85) | <0.001* | N/A              |         |
| Thyroiditis               | 7,054/98,967 (7.1)    | 2,336/98,967 (2.4)  | 3.18 (3.03-3.33) | <0.001* | 1.41 (1.34-1.49) | <0.001* | 1.39 (1.32-1.47) | <0.001* | N/A              |         |
| Autoimmune thyroiditis    | 3,379/98,967 (3.4)    | 1,082/98,967 (1.1)  | 3.20 (2.99-3.43) | <0.001* | 1.22 (1.13-1.32) | <0.001* | N/A              |         | 1.19 (1.10-1.28) | <0.001* |
| Graves' disease           | 2,546/98,967 (2.6)    | 1,105/98,967 (1.1)  | 2.34 (2.18-2.51) | <0.001* | 0.73 (0.67-0.80) | <0.001* | N/A              |         | 0.70 (0.64-0.77) | <0.001* |
| Rural (n = 228,630)       |                       |                     |                  |         |                  |         |                  |         |                  |         |
| Hypothyroidism            | 13,630/114,315 (11.9) | 4,697/114,315 (4.1) | 3.16 (3.05-3.27) | <0.001* | 1.32 (1.27-1.38) | <0.001* | 1.31 (1.26-1.37) | <0.001* | 1.32 (1.27-1.38) | <0.001* |
| Hyperthyroidism           | 7,957/114,315 (7.0)   | 3,436/114,315 (3.0) | 2.41 (2.32-2.51) | <0.001* | 0.83 (0.79-0.88) | <0.001* | 0.79 (0.75-0.83) | <0.001* | N/A              |         |
| Thyroiditis               | 7,087/114,315 (6.2)   | 2,311/114,315 (2.0) | 3.20 (3.05-3.36) | <0.001* | 1.37 (1.30-1.45) | <0.001* | 1.34 (1.27-1.42) | <0.001* | N/A              |         |
| Autoimmune thyroiditis    | 3,183/114,315 (2.8)   | 940/114,315 (0.8)   | 3.45 (3.21-3.72) | <0.001* | 1.22 (1.12-1.33) | <0.001* | N/A              |         | 1.17 (1.07-1.27) | <0.001* |



|                 |                     |                     |                  |         |                  |         |     |                  |         |
|-----------------|---------------------|---------------------|------------------|---------|------------------|---------|-----|------------------|---------|
| Graves' disease | 2,758/114,315 (2.4) | 1,102/114,315 (1.0) | 2.54 (2.37-2.72) | <0.001* | 0.71 (0.65-0.77) | <0.001* | N/A | 0.68 (0.63-0.75) | <0.001* |
|-----------------|---------------------|---------------------|------------------|---------|------------------|---------|-----|------------------|---------|

\* Un-conditional logistic regression, Significance at  $P < 0.05$ . † Model 1 was adjusted for age, sex, income, region of residence, total cholesterol, systolic blood pressure, diastolic blood pressure, fasting blood glucose, obesity, smoking, alcohol consumption, Charlson comorbidity index scores, and the number of thyroid function tests. ‡ Model 2 was adjusted for model 1 plus hypothyroidism, hyperthyroidism, and thyroiditis. § Model 3 was adjusted for model 1 plus hypothyroidism, autoimmune thyroiditis, and Graves' disease.

**Table S6.** Subgroup analyses according to thyroid diseases in each thyroid disease calculating odds ratios (95% confidence intervals) for thyroid cancer in Study II.

| Characteristics                   | Thyroid cancer        | Control             | Odds ratios for thyroid cancer |                 |                  |                 |                  |                 |                  |                 |
|-----------------------------------|-----------------------|---------------------|--------------------------------|-----------------|------------------|-----------------|------------------|-----------------|------------------|-----------------|
|                                   | (exposure/total, %)   | (exposure/total, %) | Crude                          | <i>P</i> -value | Model 1†         | <i>P</i> -value | Model 2‡         | <i>P</i> -value | Model 3§         | <i>P</i> -value |
| Non-hypothyroidism (n = 392,104)  |                       |                     |                                |                 |                  |                 |                  |                 |                  |                 |
| Hypothyroidism                    | 0/187,816 (0.0)       | 0//204,288 (0.0)    | N/A                            |                 | N/A              |                 | N/A              |                 | N/A              |                 |
| Hyperthyroidism                   | 10,915/187,816 (5.8)  | 4,857/204,288 (2.4) | 2.53 (2.45-2.62)               | <0.001*         | 0.85 (0.81-0.89) | <0.001*         | 0.82 (0.78-0.85) | <0.001*         | N/A              |                 |
| Thyroiditis                       | 9,711/187,816 (5.2)   | 2,848/204,288 (1.4) | 3.86 (3.70-4.02)               | <0.001*         | 1.79 (1.71-1.88) | <0.001*         | 1.82 (1.73-1.91) | <0.001*         | N/A              |                 |
| Autoimmune thyroiditis            | 4,062/187,816 (2.2)   | 945/204,288 (0.5)   | 4.76 (4.43-5.11)               | <0.001*         | 1.98 (1.83-2.15) | <0.001*         | N/A              |                 | 2.01 (1.85-2.17) | <0.001*         |
| Graves' disease                   | 3,913/187,816 (2.1)   | 1,594/204,288 (0.8) | 2.70 (2.55-2.87)               | <0.001*         | 0.75 (0.69-0.80) | <0.001*         | N/A              |                 | 0.73 (0.67-0.78) | <0.001*         |
| Hypothyroidism (n= 34,460)        |                       |                     |                                |                 |                  |                 |                  |                 |                  |                 |
| Hypothyroidism                    | 25,466/25,466 (100.0) | 8,994/8,994 (100.0) | N/A                            |                 | N/A              |                 | N/A              |                 | N/A              |                 |
| Hyperthyroidism                   | 3,792/25,466 (14.9)   | 1,625/8,994 (18.1)  | 0.79 (0.74-0.85)               | <0.001*         | 0.69 (0.64-0.73) | <0.001*         | 0.70 (0.66-0.75) | <0.001*         | N/A              |                 |
| Thyroiditis                       | 4,430/25,466 (17.4)   | 1,799/8,994 (20.0)  | 0.84 (0.79-0.90)               | <0.001*         | 0.75 (0.71-0.80) | <0.001*         | 0.77 (0.72-0.82) | <0.001*         | N/A              |                 |
| Autoimmune thyroiditis            | 2,500/25,466 (9.8)    | 1,077/8,994 (12.0)  | 0.80 (0.74-0.86)               | <0.001*         | 0.71 (0.65-0.76) | <0.001*         | N/A              |                 | 0.71 (0.66-0.77) | <0.001*         |
| Graves' disease                   | 1,391/25,466 (5.5)    | 613/8,994 (6.8)     | 0.79 (0.72-0.87)               | <0.001*         | 0.65 (0.59-0.72) | <0.001*         | N/A              |                 | 0.66 (0.60-0.73) | <0.001*         |
| Non-hyperthyroidism (n = 405,375) |                       |                     |                                |                 |                  |                 |                  |                 |                  |                 |

|                               |                       |                     |                  |         |                  |         |                  |         |                  |         |
|-------------------------------|-----------------------|---------------------|------------------|---------|------------------|---------|------------------|---------|------------------|---------|
| Hypothyroidism                | 21,674/198,575 (10.9) | 7,369/206,800 (3.6) | 3.32 (3.23-3.41) | <0.001* | 1.30 (1.26-1.34) | <0.001* | 1.27 (1.23-1.31) | <0.001* | 1.29 (1.25-1.33) | <0.001* |
| Hyperthyroidism               | 0/198,575 (0.0)       | 0/206,800 (0.0)     | N/A              |         | N/A              |         | N/A              |         | N/A              |         |
| Thyroiditis                   | 11,654/198,575 (5.9)  | 3,636/206,800 (1.8) | 3.48 (3.36-3.62) | <0.001* | 1.44 (1.38-1.51) | <0.001* | 1.40 (1.34-1.46) | <0.001* | N/A              |         |
| Autoimmune thyroiditis        | 5,367/198,575 (2.7)   | 1,531/206,800 (0.7) | 3.72 (3.52-3.94) | <0.001* | 1.25 (1.17-1.33) | <0.001* | N/A              |         | 1.19 (1.11-1.27) | <0.001* |
| Graves' disease               | 871/198,575 (0.4)     | 395/206,800 (0.2)   | 2.30 (2.04-2.59) | <0.001* | 1.35 (1.18-1.55) | <0.001* | N/A              |         | 1.33 (1.16-1.52) | <0.001* |
| Hyperthyroidism (n = 21,189)  |                       |                     |                  |         |                  |         |                  |         |                  |         |
| Hypothyroidism                | 3,792/14,707 (25.8)   | 1,625/6,482 (25.1)  | 1.04 (0.97-1.11) | 0.274   | 0.94 (0.88-1.01) | 0.097   | 0.94 (0.88-1.01) | 0.100   | 0.95 (0.88-1.01) | 0.116   |
| Hyperthyroidism               | 14,707/14,707 (100.0) | 6,482/6,482 (100.0) | N/A              |         | N/A              |         | N/A              |         | N/A              |         |
| Thyroiditis                   | 2,487/14,707 (16.9)   | 1,011/6,482 (15.6)  | 1.10 (1.02-1.19) | 0.018*  | 0.99 (0.91-1.08) | 0.841   | 1.00 (0.92-1.09) | 0.944   | N/A              |         |
| Autoimmune thyroiditis        | 1,195/14,707 (8.1)    | 491/6,482 (7.6)     | 1.08 (0.97-1.20) | 0.173   | 0.97 (0.87-1.09) | 0.621   | N/A              |         | 0.99 (0.89-1.11) | 0.880   |
| Graves' disease               | 4,433/14,707 (30.1)   | 1,812/6,482 (28.0)  | 1.11 (1.04-1.19) | 0.001*  | 0.93 (0.87-1.00) | 0.042*  | N/A              |         | 0.93 (0.87-1.00) | 0.046*  |
| Non-thyroiditis (n = 407,776) |                       |                     |                  |         |                  |         |                  |         |                  |         |
| Hypothyroidism                | 21,036/199,141 (10.6) | 7,195/208,635 (3.5) | 3.31 (3.22-3.40) | <0.001* | 1.44 (1.39-1.48) | <0.001* | 1.45 (1.41-1.50) | <0.001* | 1.45 (1.40-1.49) | <0.001* |
| Hyperthyroidism               | 12,220/199,141 (6.1)  | 5,471/208,635 (2.6) | 2.43 (2.35-2.51) | <0.001* | 0.85 (0.82-0.89) | <0.001* | 0.82 (0.79-0.86) | <0.001* | N/A              |         |
| Thyroiditis                   | 0/199,141 (0.0)       | 0/208,635 (0.0)     | N/A              |         | N/A              |         | N/A              |         | N/A              |         |
| Autoimmune thyroiditis        | 0/199,141 (0.0)       | 0/208,635 (0.0)     | N/A              |         | N/A              |         | N/A              |         | N/A              |         |
| Graves' disease               | 4,321/199,141 (2.2)   | 1,798/208,635 (0.9) | 2.55 (2.41-2.70) | <0.001* | 0.73 (0.69-0.79) | <0.001* | N/A              |         | 0.71 (0.66-0.76) | <0.001* |
| Thyroiditis (n = 18,788)      |                       |                     |                  |         |                  |         |                  |         |                  |         |
| Hypothyroidism                | 4,430/14,141 (31.3)   | 1,799/4,647 (38.7)  | 0.72 (0.67-0.77) | <0.001* | 0.62 (0.58-0.67) | <0.001* | 0.63 (0.59-0.68) | <0.001* | 0.61 (0.57-0.66) | <0.001* |

|                                          |                       |                     |                  |         |                  |         |                  |         |                  |         |
|------------------------------------------|-----------------------|---------------------|------------------|---------|------------------|---------|------------------|---------|------------------|---------|
| Hyperthyroidism                          | 2,487/14,141 (17.6)   | 1,011/4,647 (21.8)  | 0.77 (0.71-0.83) | <0.001* | 0.63 (0.58-0.69) | <0.001* | 0.65 (0.60-0.71) | <0.001* | N/A              |         |
| Thyroiditis                              | 14,141/14,141 (100.0) | 4,647/4,647 (100.0) | N/A              |         | N/A              |         | N/A              |         | N/A              |         |
| Autoimmune thyroiditis                   | 6,562/14,141 (46.4)   | 2,022/4,647 (43.5)  | 1.12 (1.05-1.20) | 0.001*  | 1.08 (1.01-1.16) | 0.028*  | N/A              |         | 1.16 (1.08-1.24) | <0.001* |
| Graves' disease                          | 983/14,141 (7.0)      | 409/4,647 (8.8)     | 0.77 (0.69-0.87) | <0.001* | 0.62 (0.55-0.71) | <0.001* | N/A              |         | 0.62 (0.55-0.71) | <0.001* |
| Non-autoimmune thyroiditis (n = 417,980) |                       |                     |                  |         |                  |         |                  |         |                  |         |
| Hypothyroidism                           | 22,966/206,720 (11.1) | 7,917/211,260 (3.8) | 3.21 (3.13-3.30) | <0.001* | 1.39 (1.35-1.43) | <0.001* | 1.39 (1.35-1.43) | <0.001* | 1.40 (1.36-1.44) | <0.001* |
| Hyperthyroidism                          | 13,512/206,720 (6.5)  | 5,991/211,260 (2.8) | 2.40 (2.32-2.47) | <0.001* | 0.84 (0.81-0.87) | <0.001* | 0.80 (0.77-0.83) | <0.001* | N/A              |         |
| Thyroiditis                              | 7,579/206,720 (3.7)   | 2,625/211,260 (1.2) | 3.03 (2.89-3.16) | <0.001* | 1.46 (1.39-1.54) | <0.001* | 1.44 (1.37-1.51) | <0.001* | N/A              |         |
| Autoimmune thyroiditis                   | 0/206,720 (0.0)       | 0/211,260 (0.0)     | N/A              |         | N/A              |         | N/A              |         | N/A              |         |
| Graves' disease                          | 4,812/206,720 (2.3)   | 1,979/211,260 (0.9) | 2.52 (2.39-2.66) | <0.001* | 0.73 (0.69-0.78) | <0.001* | N/A              |         | 0.71 (0.66-0.76) | <0.001* |
| Autoimmune thyroiditis (n = 8,584)       |                       |                     |                  |         |                  |         |                  |         |                  |         |
| Hypothyroidism                           | 2,500/6,562 (38.1)    | 1,077/2,022 (53.3)  | 0.54 (0.49-0.60) | <0.001* | 0.50 (0.45-0.55) | <0.001* | 0.50 (0.45-0.56) | <0.001* | 0.50 (0.45-0.55) | <0.001* |
| Hyperthyroidism                          | 1,195/6,562 (18.2)    | 491/2,022 (24.3)    | 0.69 (0.62-0.78) | <0.001* | 0.64 (0.57-0.73) | <0.001* | 0.66 (0.59-0.75) | <0.001* | N/A              |         |
| Thyroiditis                              | 6,562/6,562 (100.0)   | 2,022/2,022 (100.0) | N/A              |         | N/A              |         | N/A              |         | N/A              |         |
| Autoimmune thyroiditis                   | 6,562/6,562 (100.0)   | 2,022/2,022 (100.0) | N/A              |         | N/A              |         | N/A              |         | N/A              |         |
| Graves' disease                          | 492/6,562 (7.5)       | 228/2,022 (11.3)    | 0.64 (0.54-0.75) | <0.001* | 0.59 (0.49-0.69) | <0.001* | N/A              |         | 0.59 (0.50-0.70) | <0.001* |
| Non-Graves' disease (n = 419,053)        |                       |                     |                  |         |                  |         |                  |         |                  |         |
| Hypothyroidism                           | 24,075/207,978 (11.6) | 8,381/211,075 (4.0) | 3.17 (3.09-3.25) | <0.001* | 1.29 (1.25-1.33) | <0.001* | 1.27 (1.23-1.30) | <0.001* | 1.28 (1.24-1.32) | <0.001* |
| Hyperthyroidism                          | 10,274/207,978 (4.9)  | 4,670/211,075 (2.2) | 2.30 (2.22-2.38) | <0.001* | 0.90 (0.86-0.94) | <0.001* | 0.86 (0.83-0.90) | <0.001* | N/A              |         |

|                             |                      |                     |                  |         |                  |         |                  |         |                  |         |
|-----------------------------|----------------------|---------------------|------------------|---------|------------------|---------|------------------|---------|------------------|---------|
| Thyroiditis                 | 13,158/207,978 (6.3) | 4,238/211,075 (2.0) | 3.30 (3.18-3.41) | <0.001* | 1.40 (1.34-1.45) | <0.001* | 1.36 (1.31-1.42) | <0.001* | N/A              |         |
| Autoimmune thyroiditis      | 6,070/207,978 (2.9)  | 1,794/211,075 (0.9) | 3.51 (3.33-3.70) | <0.001* | 1.24 (1.17-1.32) | <0.001* | N/A              |         | 1.18 (1.11-1.26) | <0.001* |
| Graves' disease             | 0/207,978 (0.0)      | 0/211,075 (0.0)     | N/A              |         | N/A              |         | N/A              |         | N/A              |         |
| Graves' disease (n = 7,511) |                      |                     |                  |         |                  |         |                  |         |                  |         |
| Hypothyroidism              | 1,391/5,304 (26.2)   | 613/2,207 (27.8)    | 0.92 (0.83-1.03) | 0.167   | 0.88 (0.78-0.98) | 0.022*  | 0.88 (0.79-0.99) | 0.032*  | 0.89 (0.79-1.00) | 0.043*  |
| Hyperthyroidism             | 4,433/5,304 (83.6)   | 1,812/2,207 (82.1)  | 1.11 (0.97-1.27) | 0.120   | 0.90 (0.79-1.03) | 0.128   | 0.91 (0.79-1.04) | 0.166   | N/A              |         |
| Thyroiditis                 | 983/5,304 (18.5)     | 409/2,207 (18.5)    | 1.00 (0.88-1.14) | 1.000   | 0.95 (0.83-1.09) | 0.454   | 0.98 (0.86-1.12) | 0.745   | N/A              |         |
| Autoimmune thyroiditis      | 492/5,304 (9.3)      | 228/2,207 (10.3)    | 0.89 (0.75-1.05) | 0.157   | 0.85 (0.72-1.01) | 0.069   | N/A              |         | 0.88 (0.74-1.05) | 0.144   |
| Graves' disease             | 5,304/5,304 (100.0)  | 2,207/2,207 (100.0) | N/A              |         | N/A              |         | N/A              |         | N/A              |         |

\* Un-conditional logistic regression, Significance at  $P < 0.05$ . † Model 1 was adjusted for age, sex, income, region of residence, total cholesterol, systolic blood pressure, diastolic blood pressure, fasting blood glucose, obesity, smoking, alcohol consumption, Charlson comorbidity index scores, and the number of thyroid function tests. ‡ Model 2 was adjusted for model 1 plus hypothyroidism, hyperthyroidism, and thyroiditis. § Model 3 was adjusted for model 1 plus hypothyroidism, autoimmune thyroiditis, and Graves' disease.

**Table S7.** Subgroup analyses according to obesity, alcohol consumption, and smoking in each thyroid disease calculating odds ratios (95% confidence intervals) for thyroid cancer in Study II.

| Characteristics          | Thyroid cancer      | Control             | Odds ratios for thyroid cancer |                 |                  |                 |                  |                 |                  |                 |
|--------------------------|---------------------|---------------------|--------------------------------|-----------------|------------------|-----------------|------------------|-----------------|------------------|-----------------|
|                          | (exposure/total, %) | (exposure/total, %) | Crude                          | <i>P</i> -value | Model 1†         | <i>P</i> -value | Model 2‡         | <i>P</i> -value | Model 3§         | <i>P</i> -value |
| Underweight (n = 16,001) |                     |                     |                                |                 |                  |                 |                  |                 |                  |                 |
| Hypothyroidism           | 866/6,637 (13.1)    | 378/9,364 (4.0)     | 3.57 (3.15-4.04)               | <0.001*         | 1.42 (1.23-1.65) | <0.001*         | 1.37 (1.18-1.59) | <0.001*         | 1.40 (1.21-1.63) | <0.001*         |
| Hyperthyroidism          | 610/6,637 (9.2)     | 351/9,364 (3.8)     | 2.60 (2.27-2.98)               | <0.001*         | 0.89 (0.76-1.05) | 0.182           | 0.84 (0.71-0.99) | 0.042*          | N/A              |                 |
| Thyroiditis              | 505/6,637 (7.6)     | 199/9,364 (2.1)     | 3.79 (3.21-4.48)               | <0.001*         | 1.58 (1.30-1.91) | <0.001*         | 1.52 (1.25-1.84) | <0.001*         | N/A              |                 |
| Autoimmune thyroiditis   | 243/6,637 (3.7)     | 90/9,364 (1.0)      | 3.92 (3.07-5.00)               | <0.001*         | 1.34 (1.01-1.78) | 0.041*          | N/A              |                 | 1.26 (0.95-1.67) | 0.117           |

|                             |                      |                    |                  |         |                  |         |                  |         |                  |         |
|-----------------------------|----------------------|--------------------|------------------|---------|------------------|---------|------------------|---------|------------------|---------|
| Graves' disease             | 225/6,637 (3.4)      | 109/9,364 (1.2)    | 2.98 (2.37-3.75) | <0.001* | 0.86 (0.64-1.15) | 0.298   | N/A              |         | 0.81 (0.61-1.09) | 0.163   |
| Normal weight (n = 176,666) |                      |                    |                  |         |                  |         |                  |         |                  |         |
| Hypothyroidism              | 10,721/84,051 (12.8) | 3,999/92,615 (4.3) | 3.24 (3.12-3.36) | <0.001* | 1.32 (1.27-1.38) | <0.001* | 1.31 (1.25-1.37) | <0.001* | 1.34 (1.28-1.40) | <0.001* |
| Hyperthyroidism             | 6,509/84,051 (7.7)   | 3,047/92,615 (3.3) | 2.47 (2.36-2.58) | <0.001* | 0.84 (0.79-0.88) | <0.001* | 0.80 (0.75-0.84) | <0.001* | N/A              |         |
| Thyroiditis                 | 6,415/84,051 (7.6)   | 2,262/92,615 (2.4) | 3.30 (3.14-3.47) | <0.001* | 1.34 (1.27-1.42) | <0.001* | 1.32 (1.24-1.39) | <0.001* | N/A              |         |
| Autoimmune thyroiditis      | 3,005/84,051 (3.6)   | 1,011/92,615 (1.1) | 3.36 (3.13-3.61) | <0.001* | 1.15 (1.06-1.25) | 0.001*  | N/A              |         | 1.12 (1.03-1.22) | 0.010*  |
| Graves' disease             | 2,423/84,051 (2.9)   | 1,076/92,615 (1.2) | 2.53 (2.35-2.71) | <0.001* | 0.70 (0.64-0.76) | <0.001* | N/A              |         | 0.67 (0.61-0.73) | <0.001* |
| Overweight (n = 97,311)     |                      |                    |                  |         |                  |         |                  |         |                  |         |
| Hypothyroidism              | 5,947/49,788 (11.9)  | 2,058/47,523 (4.3) | 3.00 (2.85-3.16) | <0.001* | 1.27 (1.20-1.35) | <0.001* | 1.26 (1.19-1.34) | <0.001* | 1.28 (1.20-1.36) | <0.001* |
| Hyperthyroidism             | 3,308/49,788 (6.6)   | 1,445/47,523 (3.0) | 2.27 (2.13-2.42) | <0.001* | 0.79 (0.73-0.85) | <0.001* | 0.75 (0.70-0.81) | <0.001* | N/A              |         |
| Thyroiditis                 | 3,172/49,788 (6.4)   | 1,041/47,523 (2.2) | 3.04 (2.83-3.26) | <0.001* | 1.34 (1.23-1.45) | <0.001* | 1.32 (1.22-1.43) | <0.001* | N/A              |         |
| Autoimmune thyroiditis      | 1,528/49,788 (3.1)   | 444/47,523 (0.9)   | 3.36 (3.02-3.73) | <0.001* | 1.24 (1.10-1.40) | 0.000   | N/A              |         | 1.22 (1.08-1.37) | 0.002*  |
| Graves' disease             | 1,163/49,788 (2.3)   | 472/47,523 (1.0)   | 2.38 (2.14-2.65) | <0.001* | 0.72 (0.63-0.82) | <0.001* | N/A              |         | 0.69 (0.60-0.79) | <0.001* |
| Obese (n = 136,586)         |                      |                    |                  |         |                  |         |                  |         |                  |         |
| Hypothyroidism              | 7,932/72,806 (10.9)  | 2,559/63,780 (4.0) | 2.93 (2.79-3.06) | <0.001* | 1.27 (1.20-1.34) | <0.001* | 1.25 (1.19-1.32) | <0.001* | 1.28 (1.21-1.35) | <0.001* |
| Hyperthyroidism             | 4,280/72,806 (5.9)   | 1,639/63,780 (2.6) | 2.37 (2.23-2.51) | <0.001* | 0.88 (0.82-0.94) | <0.001* | 0.84 (0.78-0.90) | <0.001* | N/A              |         |
| Thyroiditis                 | 4,049/72,806 (5.6)   | 1,145/63,780 (1.8) | 3.22 (3.01-3.44) | <0.001* | 1.48 (1.37-1.59) | <0.001* | 1.46 (1.35-1.57) | <0.001* | N/A              |         |
| Autoimmune thyroiditis      | 1,786/72,806 (2.5)   | 477/63,780 (0.8)   | 3.34 (3.02-3.69) | <0.001* | 1.30 (1.16-1.46) | <0.001* | N/A              |         | 1.29 (1.15-1.44) | <0.001* |
| Graves' disease             | 1,493/72,806 (2.1)   | 550/63,780 (0.9)   | 2.40 (2.18-2.65) | <0.001* | 0.73 (0.65-0.83) | <0.001* | N/A              |         | 0.70 (0.62-0.79) | <0.001* |

|                                       |                       |                     |                  |         |                  |         |                  |         |                  |         |
|---------------------------------------|-----------------------|---------------------|------------------|---------|------------------|---------|------------------|---------|------------------|---------|
| Non-smoker (n = 356,022)              |                       |                     |                  |         |                  |         |                  |         |                  |         |
| Hypothyroidism                        | 23,399/180,976 (12.9) | 8,299/175,046 (4.7) | 2.98 (2.91-3.06) | <0.001* | 1.28 (1.25-1.32) | <0.001* | 1.27 (1.23-1.31) | <0.001* | 1.28 (1.24-1.32) | <0.001* |
| Hyperthyroidism                       | 13,084/180,976 (7.2)  | 5,775/175,046 (3.3) | 2.28 (2.21-2.36) | <0.001* | 0.85 (0.82-0.88) | <0.001* | 0.81 (0.78-0.84) | <0.001* | N/A              |         |
| Thyroiditis                           | 12,990/180,976 (7.2)  | 4,352/175,046 (2.5) | 3.03 (2.93-3.14) | <0.001* | 1.36 (1.30-1.41) | <0.001* | 1.33 (1.28-1.39) | <0.001* | N/A              |         |
| Autoimmune thyroiditis                | 6,072/180,976 (3.4)   | 1,893/175,046 (1.1) | 3.18 (3.02-3.35) | <0.001* | 1.21 (1.14-1.28) | <0.001* | N/A              |         | 1.17 (1.10-1.24) | <0.001* |
| Graves' disease                       | 4,629/180,976 (2.6)   | 1,945/175,046 (1.1) | 2.34 (2.21-2.46) | <0.001* | 0.74 (0.69-0.79) | <0.001* | N/A              |         | 0.71 (0.67-0.76) | <0.001* |
| Past and current smoker (n = 70,542)  |                       |                     |                  |         |                  |         |                  |         |                  |         |
| Hypothyroidism                        | 2,067/32,306 (6.4)    | 695/38,236 (1.8)    | 3.69 (3.38-4.03) | <0.001* | 1.61 (1.45-1.78) | <0.001* | 1.58 (1.43-1.76) | <0.001* | 1.61 (1.46-1.79) | <0.001* |
| Hyperthyroidism                       | 1,623/32,306 (5.0)    | 707/38,236 (1.9)    | 2.81 (2.57-3.07) | <0.001* | 0.80 (0.71-0.90) | <0.001* | 0.74 (0.66-0.83) | <0.001* | N/A              |         |
| Thyroiditis                           | 1,151/32,306 (3.6)    | 295/38,236 (0.8)    | 4.75 (4.18-5.40) | <0.001* | 1.99 (1.72-2.31) | <0.001* | 1.96 (1.69-2.27) | <0.001* | N/A              |         |
| Autoimmune thyroiditis                | 490/32,306 (1.5)      | 129/38,236 (0.3)    | 4.55 (3.75-5.53) | <0.001* | 1.50 (1.19-1.89) | 0.001*  | N/A              |         | 1.42 (1.12-1.78) | 0.003*  |
| Graves' disease                       | 675/32,306 (2.1)      | 262/38,236 (0.7)    | 3.09 (2.68-3.57) | <0.001* | 0.58 (0.47-0.70) | <0.001* | N/A              |         | 0.55 (0.45-0.67) | <0.001* |
| Alcohol < 1 time a week (n = 296,725) |                       |                     |                  |         |                  |         |                  |         |                  |         |
| Hypothyroidism                        | 19,750/150,844 (13.1) | 6,950/145,881 (4.8) | 3.01 (2.93-3.10) | <0.001* | 1.27 (1.23-1.31) | <0.001* | 1.26 (1.22-1.30) | <0.001* | 1.27 (1.23-1.31) | <0.001* |
| Hyperthyroidism                       | 11,264/150,844 (7.5)  | 4,884/145,881 (3.4) | 2.33 (2.25-2.41) | <0.001* | 0.84 (0.81-0.88) | <0.001* | 0.81 (0.78-0.84) | <0.001* | N/A              |         |
| Thyroiditis                           | 10,798/150,844 (7.2)  | 3,636/145,881 (2.5) | 3.02 (2.90-3.13) | <0.001* | 1.32 (1.26-1.38) | <0.001* | 1.30 (1.24-1.35) | <0.001* | N/A              |         |
| Autoimmune thyroiditis                | 5,098/150,844 (3.4)   | 1,601/145,881 (1.1) | 3.15 (2.98-3.34) | <0.001* | 1.19 (1.11-1.27) | <0.001* | N/A              |         | 1.15 (1.08-1.22) | <0.001* |
| Graves' disease                       | 3,953/150,844 (2.6)   | 1,648/145,881 (1.1) | 2.35 (2.22-2.49) | <0.001* | 0.72 (0.67-0.78) | <0.001* | N/A              |         | 0.70 (0.65-0.75) | <0.001* |
| Alcohol ≥ 1 time a week (n = 129,839) |                       |                     |                  |         |                  |         |                  |         |                  |         |

|                        |                    |                    |                  |         |                  |         |                  |         |                  |         |
|------------------------|--------------------|--------------------|------------------|---------|------------------|---------|------------------|---------|------------------|---------|
| Hypothyroidism         | 5,716/62,438 (9.2) | 2,044/67,401 (3.0) | 3.22 (3.06-3.39) | <0.001* | 1.42 (1.34-1.51) | <0.001* | 1.39 (1.31-1.48) | <0.001* | 1.42 (1.33-1.50) | <0.001* |
| Hyperthyroidism        | 3,443/62,438 (5.5) | 1,598/67,401 (2.4) | 2.40 (2.26-2.55) | <0.001* | 0.84 (0.78-0.91) | <0.001* | 0.78 (0.72-0.84) | <0.001* | N/A              |         |
| Thyroiditis            | 3,343/62,438 (5.4) | 1,011/67,401 (1.5) | 3.72 (3.46-3.99) | <0.001* | 1.65 (1.52-1.79) | <0.001* | 1.61 (1.49-1.75) | <0.001* | N/A              |         |
| Autoimmune thyroiditis | 1,464/62,438 (2.3) | 421/67,401 (0.6)   | 3.82 (3.43-4.26) | <0.001* | 1.34 (1.18-1.52) | <0.001* | N/A              |         | 1.27 (1.12-1.44) | <0.001* |
| Graves' disease        | 1,351/62,438 (2.2) | 559/67,401 (0.8)   | 2.64 (2.39-2.92) | <0.001* | 0.71 (0.63-0.81) | <0.001* | N/A              |         | 0.68 (0.60-0.77) | <0.001* |

\* Un-conditional logistic regression, Significance at  $P < 0.05$ . † Model 1 was adjusted for age, sex, income, region of residence, total cholesterol, systolic blood pressure, diastolic blood pressure, fasting blood glucose, obesity, smoking, alcohol consumption, Charlson comorbidity index scores, and the number of thyroid function tests. ‡ Model 2 was adjusted for model 1 plus hypothyroidism, hyperthyroidism, and thyroiditis. § Model 3 was adjusted for model 1 plus hypothyroidism, autoimmune thyroiditis, and Graves' disease.

**Table S8.** Subgroup analyses according to CCI, total cholesterol, blood pressure, and fasting blood glucose in each thyroid disease calculating odds ratios (95% confidence intervals) for thyroid cancer in Study II.

| Characteristics           | Thyroid cancer        | Control             | Odds ratios for thyroid cancer |                 |                  |                 |                  |                 |                  |                 |
|---------------------------|-----------------------|---------------------|--------------------------------|-----------------|------------------|-----------------|------------------|-----------------|------------------|-----------------|
|                           | (exposure/total, %)   | (exposure/total, %) | Crude                          | <i>P</i> -value | Model 1†         | <i>P</i> -value | Model 2‡         | <i>P</i> -value | Model 3§         | <i>P</i> -value |
| CCI 0 score (n = 339,817) |                       |                     |                                |                 |                  |                 |                  |                 |                  |                 |
| Hypothyroidism            | 19,723/168,375 (11.7) | 6,912/171,442 (4.0) | 3.16 (3.07-3.25)               | <0.001*         | 1.28 (1.24-1.32) | <0.001*         | 1.27 (1.23-1.31) | <0.001*         | 1.28 (1.24-1.33) | <0.001*         |
| Hyperthyroidism           | 11,332/168,375 (6.7)  | 5,125/171,442 (3.0) | 2.34 (2.26-2.42)               | <0.001*         | 0.79 (0.76-0.83) | <0.001*         | 0.75 (0.72-0.79) | <0.001*         | N/A              |                 |
| Thyroiditis               | 11,173/168,375 (6.6)  | 3,698/171,442 (2.2) | 3.22 (3.10-3.35)               | <0.001*         | 1.34 (1.29-1.40) | <0.001*         | 1.33 (1.27-1.39) | <0.001*         | N/A              |                 |
| Autoimmune thyroiditis    | 5,193/168,375 (3.1)   | 1,635/171,442 (1.0) | 3.31 (3.13-3.50)               | <0.001*         | 1.15 (1.08-1.23) | <0.001*         | N/A              |                 | 1.12 (1.05-1.19) | 0.001*          |
| Graves' disease           | 4,150/168,375 (2.5)   | 1,770/171,442 (1.0) | 2.42 (2.29-2.56)               | <0.001*         | 0.67 (0.62-0.72) | <0.001*         | N/A              |                 | 0.65 (0.60-0.70) | <0.001*         |
| CCI 1 score (n = 58,055)  |                       |                     |                                |                 |                  |                 |                  |                 |                  |                 |
| Hypothyroidism            | 4,435/34,820 (12.7)   | 1,125/23,235 (4.8)  | 2.87 (2.68-3.07)               | <0.001*         | 1.39 (1.29-1.50) | <0.001*         | 1.36 (1.26-1.47) | <0.001*         | 1.38 (1.28-1.48) | <0.001*         |
| Hyperthyroidism           | 2,583/34,820 (7.4)    | 772/23,235 (3.3)    | 2.33 (2.15-2.53)               | <0.001*         | 0.98 (0.89-1.07) | 0.626           | 0.92 (0.84-1.02) | 0.099           | N/A              |                 |

|                                                      |                       |                     |                  |         |                  |         |                  |         |                  |         |
|------------------------------------------------------|-----------------------|---------------------|------------------|---------|------------------|---------|------------------|---------|------------------|---------|
| Thyroiditis                                          | 2,354/34,820 (6.8)    | 521/23,235 (2.2)    | 3.16 (2.87-3.48) | <0.001* | 1.56 (1.41-1.73) | <0.001* | 1.51 (1.36-1.68) | <0.001* | N/A              |         |
| Autoimmune thyroiditis                               | 1,092/34,820 (3.1)    | 196/23,235 (0.8)    | 3.81 (3.27-4.43) | <0.001* | 1.63 (1.38-1.92) | <0.001* | N/A              |         | 1.56 (1.32-1.84) | <0.001* |
| Graves' disease                                      | 881/34,820 (2.5)      | 260/23,235 (1.1)    | 2.29 (2.00-2.64) | <0.001* | 0.83 (0.71-0.98) | 0.026*  | N/A              |         | 0.79 (0.67-0.93) | 0.005*  |
| CCI ≥ 2 score (n = 28,692)                           |                       |                     |                  |         |                  |         |                  |         |                  |         |
| Hypothyroidism                                       | 1,308/10,087 (13.0)   | 957/18,605 (5.1)    | 2.75 (2.52-3.00) | <0.001* | 1.18 (1.06-1.31) | 0.002*  | 1.15 (1.04-1.28) | 0.009*  | 1.18 (1.06-1.31) | 0.003*  |
| Hyperthyroidism                                      | 792/10,087 (7.9)      | 585/18,605 (3.1)    | 2.62 (2.35-2.93) | <0.001* | 1.02 (0.89-1.17) | 0.759   | 1.00 (0.87-1.14) | 0.992   | N/A              |         |
| Thyroiditis                                          | 614/10,087 (6.1)      | 428/18,605 (2.3)    | 2.75 (2.43-3.12) | <0.001* | 1.31 (1.13-1.52) | <0.001* | 1.28 (1.11-1.49) | 0.001*  | N/A              |         |
| Autoimmune thyroiditis                               | 277/10,087 (2.8)      | 191/18,605 (1.0)    | 2.72 (2.26-3.28) | <0.001* | 1.07 (0.86-1.33) | 0.543   | N/A              |         | 1.03 (0.83-1.29) | 0.795   |
| Graves' disease                                      | 273/10,087 (2.7)      | 177/18,605 (1.0)    | 2.89 (2.39-3.50) | <0.001* | 0.95 (0.75-1.21) | 0.699   | N/A              |         | 0.94 (0.74-1.19) | 0.619   |
| Total cholesterol < 200 mg/dL (n = 247,272)          |                       |                     |                  |         |                  |         |                  |         |                  |         |
| Hypothyroidism                                       | 15,333/125,559 (12.2) | 5,176/121,713 (4.3) | 3.13 (3.03-3.24) | <0.001* | 1.30 (1.26-1.35) | <0.001* | 1.29 (1.24-1.34) | <0.001* | 1.31 (1.26-1.36) | <0.001* |
| Hyperthyroidism                                      | 9,204/125,559 (7.3)   | 3,834/121,713 (3.2) | 2.43 (2.34-2.53) | <0.001* | 0.84 (0.81-0.89) | <0.001* | 0.80 (0.77-0.84) | <0.001* | N/A              |         |
| Thyroiditis                                          | 8,630/125,559 (6.9)   | 2,739/121,713 (2.3) | 3.21 (3.07-3.35) | <0.001* | 1.37 (1.31-1.44) | <0.001* | 1.35 (1.28-1.42) | <0.001* | N/A              |         |
| Autoimmune thyroiditis                               | 4,006/125,559 (3.2)   | 1,182/121,713 (1.0) | 3.36 (3.15-3.59) | <0.001* | 1.19 (1.11-1.28) | <0.001* | N/A              |         | 1.15 (1.06-1.23) | <0.001* |
| Graves' disease                                      | 3,439/125,559 (2.7)   | 1,313/121,713 (1.1) | 2.58 (2.42-2.75) | <0.001* | 0.75 (0.70-0.82) | <0.001* | N/A              |         | 0.73 (0.67-0.79) | <0.001* |
| Total cholesterol ≥ 200 to < 240 mg/dL (n = 129,491) |                       |                     |                  |         |                  |         |                  |         |                  |         |
| Hypothyroidism                                       | 7,421/64,098 (11.6)   | 2,746/65,393 (4.2)  | 2.99 (2.86-3.13) | <0.001* | 1.27 (1.20-1.34) | <0.001* | 1.25 (1.19-1.32) | <0.001* | 1.27 (1.20-1.34) | <0.001* |
| Hyperthyroidism                                      | 4,133/64,098 (6.5)    | 1,935/65,393 (3.0)  | 2.26 (2.14-2.39) | <0.001* | 0.83 (0.78-0.89) | <0.001* | 0.80 (0.74-0.85) | <0.001* | N/A              |         |
| Thyroiditis                                          | 4,085/64,098 (6.4)    | 1,392/65,393 (2.1)  | 3.13 (2.94-3.33) | <0.001* | 1.41 (1.32-1.52) | <0.001* | 1.39 (1.30-1.49) | <0.001* | N/A              |         |



|                                                        |                       |                     |                  |         |                  |         |                  |         |                  |         |
|--------------------------------------------------------|-----------------------|---------------------|------------------|---------|------------------|---------|------------------|---------|------------------|---------|
| Autoimmune thyroiditis                                 | 1,916/64,098 (3.0)    | 609/65,393 (0.9)    | 3.28 (2.99-3.59) | <0.001* | 1.24 (1.12-1.38) | <0.001* | N/A              |         | 1.20 (1.08-1.34) | 0.001*  |
| Graves' disease                                        | 1,446/64,098 (2.3)    | 660/65,393 (1.0)    | 2.26 (2.06-2.48) | <0.001* | 0.69 (0.62-0.78) | <0.001* | N/A              |         | 0.67 (0.60-0.75) | <0.001* |
| Total cholesterol $\geq$ 240 mg/dL (n = 49,801)        |                       |                     |                  |         |                  |         |                  |         |                  |         |
| Hypothyroidism                                         | 2,712/23,625 (11.5)   | 1,072/26,176 (4.1)  | 3.04 (2.82-3.27) | <0.001* | 1.33 (1.22-1.45) | <0.001* | 1.32 (1.21-1.44) | <0.001* | 1.34 (1.23-1.45) | <0.001* |
| Hyperthyroidism                                        | 1,370/23,625 (5.8)    | 713/26,176 (2.7)    | 2.20 (2.01-2.41) | <0.001* | 0.83 (0.74-0.93) | 0.001*  | 0.79 (0.70-0.88) | <0.001* | N/A              |         |
| Thyroiditis                                            | 1,426/23,625 (6.0)    | 516/26,176 (2.0)    | 3.19 (2.88-3.54) | <0.001* | 1.38 (1.23-1.55) | <0.001* | 1.36 (1.21-1.53) | <0.001* | N/A              |         |
| Autoimmune thyroiditis                                 | 640/23,625 (2.7)      | 231/26,176 (0.9)    | 3.12 (2.68-3.63) | <0.001* | 1.26 (1.06-1.50) | 0.008*  | N/A              |         | 1.23 (1.03-1.46) | 0.021*  |
| Graves' disease                                        | 419/23,625 (1.8)      | 234/26,176 (0.9)    | 2.00 (1.70-2.35) | <0.001* | 0.58 (0.48-0.71) | <0.001* | N/A              |         | 0.56 (0.46-0.69) | <0.001* |
| SBP < 140 mmHg and DBP < 90 mmHg (n = 370,946)         |                       |                     |                  |         |                  |         |                  |         |                  |         |
| Hypothyroidism                                         | 22,366/184,891 (12.1) | 8,018/186,055 (4.3) | 3.06 (2.98-3.14) | <0.001* | 1.30 (1.26-1.34) | <0.001* | 1.28 (1.25-1.32) | <0.001* | 1.30 (1.26-1.34) | <0.001* |
| Hyperthyroidism                                        | 12,855/184,891 (7.0)  | 5,782/186,055 (3.1) | 2.33 (2.26-2.40) | <0.001* | 0.84 (0.81-0.87) | <0.001* | 0.80 (0.77-0.83) | <0.001* | N/A              |         |
| Thyroiditis                                            | 12,617/184,891 (6.8)  | 4,246/186,055 (2.3) | 3.14 (3.03-3.25) | <0.001* | 1.37 (1.31-1.42) | <0.001* | 1.35 (1.29-1.40) | <0.001* | N/A              |         |
| Autoimmune thyroiditis                                 | 5,885/184,891 (3.2)   | 1,845/186,055 (1.0) | 3.28 (3.11-3.46) | <0.001* | 1.22 (1.15-1.29) | <0.001* | N/A              |         | 1.17 (1.10-1.25) | <0.001* |
| Graves' disease                                        | 4,686/184,891 (2.5)   | 1,975/186,055 (1.1) | 2.42 (2.30-2.55) | <0.001* | 0.73 (0.68-0.78) | <0.001* | N/A              |         | 0.70 (0.66-0.75) | <0.001* |
| SBP $\geq$ 140 mmHg or DBP $\geq$ 90 mmHg (n = 55,618) |                       |                     |                  |         |                  |         |                  |         |                  |         |
| Hypothyroidism                                         | 3,100/28,391 (10.9)   | 976/27,227 (3.6)    | 3.30 (3.06-3.55) | <0.001* | 1.29 (1.19-1.41) | <0.001* | 1.27 (1.17-1.39) | <0.001* | 1.29 (1.19-1.41) | <0.001* |
| Hyperthyroidism                                        | 1,852/28,391 (6.5)    | 700/27,227 (2.6)    | 2.65 (2.42-2.89) | <0.001* | 0.85 (0.76-0.95) | 0.003*  | 0.82 (0.73-0.91) | <0.001* | N/A              |         |
| Thyroiditis                                            | 1,524/28,391 (5.4)    | 401/27,227 (1.5)    | 3.80 (3.40-4.24) | <0.001* | 1.58 (1.40-1.79) | <0.001* | 1.55 (1.37-1.76) | <0.001* | N/A              |         |
| Autoimmune thyroiditis                                 | 677/28,391 (2.4)      | 177/27,227 (0.7)    | 3.73 (3.16-4.41) | <0.001* | 1.23 (1.02-1.49) | 0.030*  | N/A              |         | 1.19 (0.98-1.44) | 0.076   |

|                                                 |                       |                     |                  |         |                  |         |                  |         |                  |         |
|-------------------------------------------------|-----------------------|---------------------|------------------|---------|------------------|---------|------------------|---------|------------------|---------|
| Graves' disease                                 | 618/28,391 (2.2)      | 232/27,227 (0.9)    | 2.59 (2.22-3.01) | <0.001* | 0.65 (0.54-0.79) | <0.001* | N/A              |         | 0.63 (0.52-0.77) | <0.001* |
| Fasting blood glucose < 100 mg/dL (n = 306,614) |                       |                     |                  |         |                  |         |                  |         |                  |         |
| Hypothyroidism                                  | 18,856/153,297 (12.3) | 6,530/153,317 (4.3) | 3.15 (3.06-3.25) | <0.001* | 1.30 (1.26-1.35) | <0.001* | 1.29 (1.25-1.33) | <0.001* | 1.30 (1.26-1.35) | <0.001* |
| Hyperthyroidism                                 | 10,654/153,297 (7.0)  | 4,645/153,317 (3.0) | 2.39 (2.31-2.48) | <0.001* | 0.84 (0.80-0.88) | <0.001* | 0.80 (0.76-0.83) | <0.001* | N/A              |         |
| Thyroiditis                                     | 10,650/153,297 (7.0)  | 3,442/153,317 (2.3) | 3.25 (3.13-3.38) | <0.001* | 1.37 (1.31-1.44) | <0.001* | 1.35 (1.29-1.41) | <0.001* | N/A              |         |
| Autoimmune thyroiditis                          | 5,006/153,297 (3.3)   | 1,518/153,317 (1.0) | 3.38 (3.19-3.58) | <0.001* | 1.19 (1.11-1.27) | <0.001* | N/A              |         | 1.14 (1.07-1.22) | <0.001* |
| Graves' disease                                 | 3,882/153,297 (2.5)   | 1,600/153,317 (1.0) | 2.46 (2.32-2.61) | <0.001* | 0.73 (0.68-0.79) | <0.001* | N/A              |         | 0.71 (0.66-0.76) | <0.001* |
| Fasting blood glucose ≥ 100 mg/dL (n = 119,950) |                       |                     |                  |         |                  |         |                  |         |                  |         |
| Hypothyroidism                                  | 6,610/59,985 (11.0)   | 2,464/59,965 (4.1)  | 2.89 (2.76-3.03) | <0.001* | 2.89 (2.76-3.03) | <0.001* | 1.26 (1.19-1.33) | <0.001* | 1.27 (1.20-1.34) | <0.001* |
| Hyperthyroidism                                 | 4,053/59,985 (6.8)    | 1,837/59,965 (3.1)  | 2.29 (2.17-2.43) | <0.001* | 2.29 (2.17-2.43) | <0.001* | 0.80 (0.75-0.86) | <0.001* | N/A              |         |
| Thyroiditis                                     | 3,491/59,985 (5.8)    | 1,205/59,965 (2.0)  | 3.01 (2.82-3.22) | <0.001* | 3.01 (2.82-3.22) | <0.001* | 1.38 (1.28-1.48) | <0.001* | N/A              |         |
| Autoimmune thyroiditis                          | 1,556/59,985 (2.6)    | 504/59,965 (0.8)    | 3.14 (2.84-3.48) | <0.001* | 3.14 (2.84-3.48) | <0.001* | N/A              |         | 1.24 (1.11-1.39) | <0.001* |
| Graves' disease                                 | 1,422/59,985 (2.4)    | 607/59,965 (1.0)    | 2.37 (2.16-2.61) | <0.001* | 2.37 (2.16-2.61) | <0.001* | N/A              |         | 0.65 (0.58-0.73) | <0.001* |

\* Un-conditional logistic regression, Significance at  $P < 0.05$ . † Model 1 was adjusted for age, sex, income, region of residence, total cholesterol, systolic blood pressure, diastolic blood pressure, fasting blood glucose, obesity, smoking, alcohol consumption, Charlson comorbidity index scores, and the number of thyroid function tests. ‡ Model 2 was adjusted for model 1 plus hypothyroidism, hyperthyroidism, and thyroiditis. § Model 3 was adjusted for model 1 plus hypothyroidism, autoimmune thyroiditis, and Graves' disease.
